# Supplementary material
Source: publisher figshare collection journal article supplement (https://gsapubs.figshare.com/articles/dataset/_/22596808)

04MC155

central age =  $1974.0 \pm 24.4$  (n=279)  
 MSWD = 1200,  $p(\chi^2) = 0$   
 dispersion =  $20.66 \pm 0.88\%$

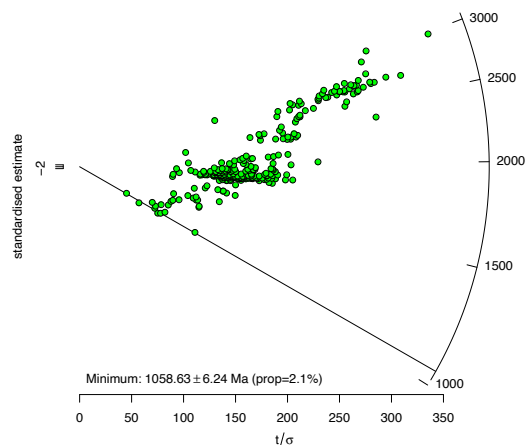

19MC025

central age =  $1729.5 \pm 73.4$  (n=406)  
 MSWD = 4200,  $p(\chi^2) = 0$   
 dispersion =  $42.73 \pm 3.00\%$

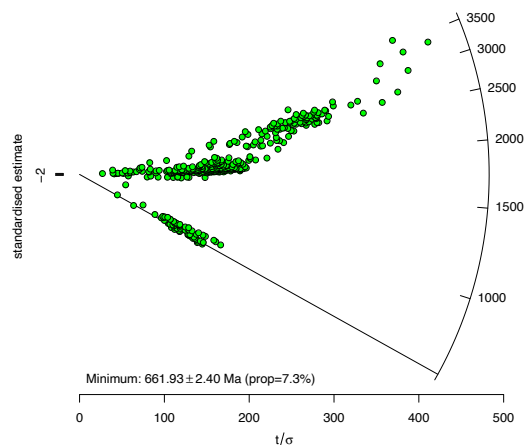

19MC027

central age =  $2114.1 \pm 29.6$  (n=518)  
 MSWD = 630,  $p(\chi^2) = 0$   
 dispersion =  $15.87 \pm 0.99\%$

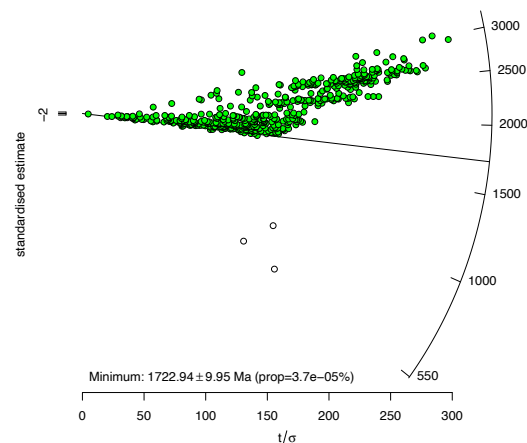

19MC030

central age =  $2060.4 \pm 35.4$  (n=186)  
 MSWD = 630,  $p(\chi^2) = 0$   
 dispersion =  $11.70 \pm 1.22\%$

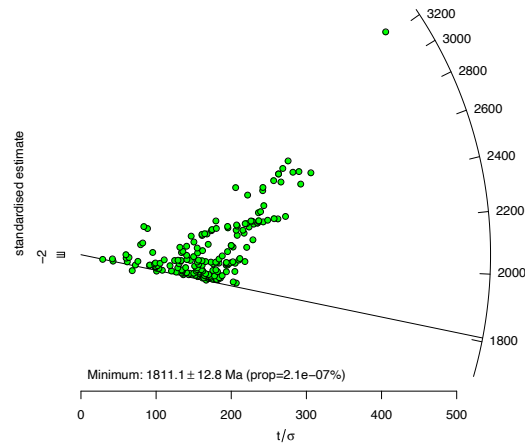

19MC051

central age =  $2075.5 \pm 54.7$  (n=132)  
 MSWD = 800,  $p(\chi^2) = 0$   
 dispersion =  $15.10 \pm 1.87\%$

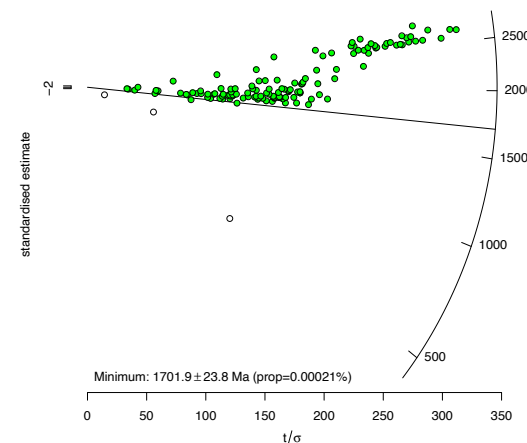

19MC023

central age =  $1935.4 \pm 50.3$  (n=536)  
 MSWD = 2000,  $p(\chi^2) = 0$   
 dispersion =  $30.06 \pm 1.84\%$

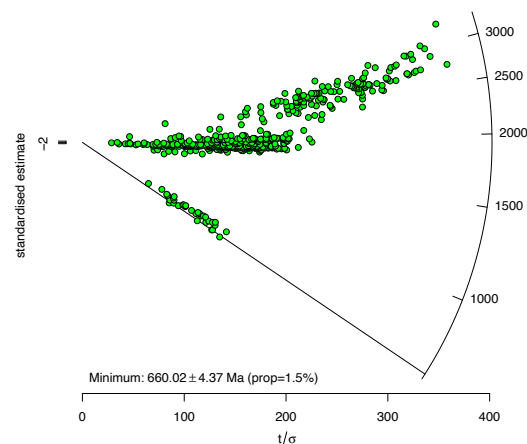

19MC035

central age =  $1871.9 \pm 48.3$  (n=389)  
 MSWD = 1000,  $p(\chi^2) = 0$   
 dispersion =  $25.38 \pm 1.83\%$

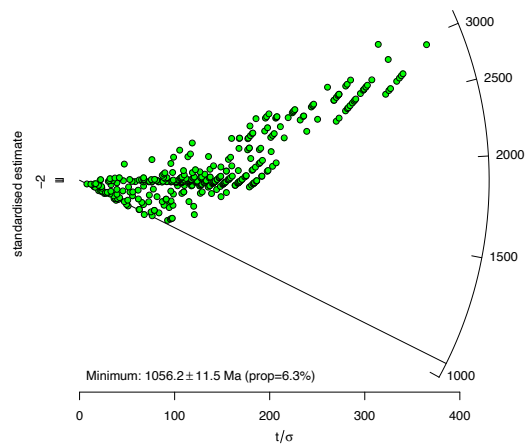

00JN17-6

central age =  $2094.6 \pm 30.9$  (n=285)  
 MSWD = 800,  $p(\chi^2) = 0$   
 dispersion =  $12.43 \pm 1.04\%$

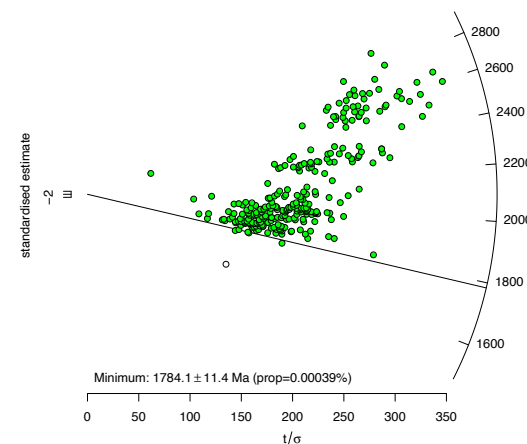

*Recycled  
Snowcap?*

Figure S4 – part 1

## Snowcap assemblage

Kroeger, E.D.L., McClelland, W.C., Colpron, M., Piercey, S.J., and Gehrels, G.E., 2023, Detrital zircon U-Pb and Hf isotope signature of Carboniferous and older strata of the Yukon-Tanana terrane in Yukon, Canadian Cordillera: Implications for terrane correlations and the onset of Late Devonian arc magmatism: *Geosphere*, v. 19, <https://doi.org/10.1130/GES02607.1>.

18MC016

central age =  $367.00 \pm 0.69$  (n=187)  
 MSWD = 1.2,  $p(\chi^2) = 0.048$   
 dispersion =  $0.52 \pm 0.32\%$

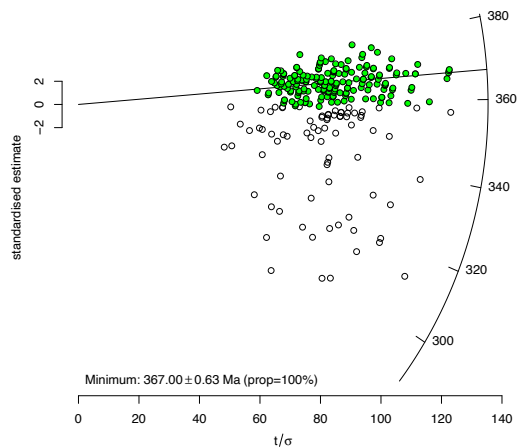

18MC018

central age =  $368.29 \pm 1.00$  (n=221)  
 MSWD = 2,  $p(\chi^2) = 2.2e-16$   
 dispersion =  $1.40 \pm 0.27\%$

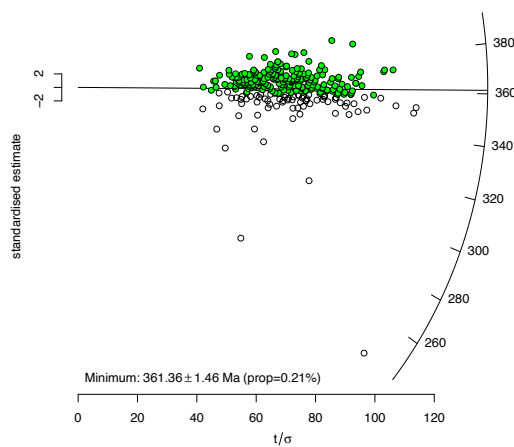*North River formation*

18MC013

central age =  $365.29 \pm 1.07$  (n=154)  
 MSWD = 3,  $p(\chi^2) = 0$   
 dispersion =  $1.46 \pm 0.26\%$

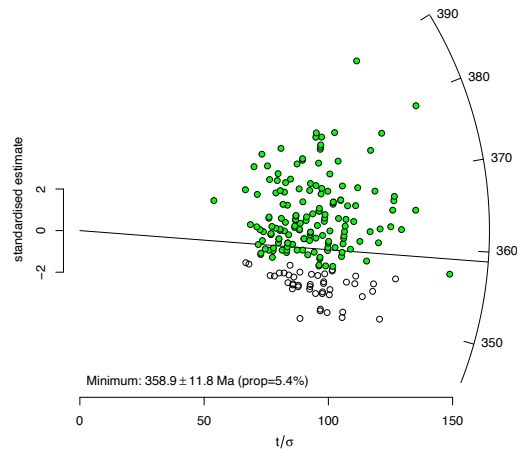

18MC019

central age =  $363.83 \pm 1.41$  (n=81)  
 MSWD = 2.7,  $p(\chi^2) = 1.4e-14$   
 dispersion =  $1.36 \pm 0.35\%$

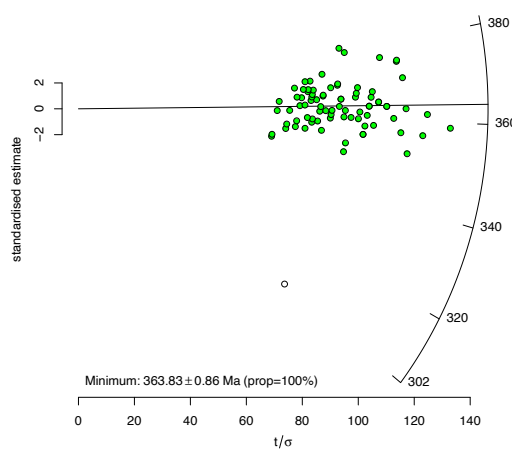

18MC020

central age =  $362.38 \pm 1.75$  (n=183)  
 MSWD = 5.7,  $p(\chi^2) = 0$   
 dispersion =  $3.01 \pm 0.37\%$

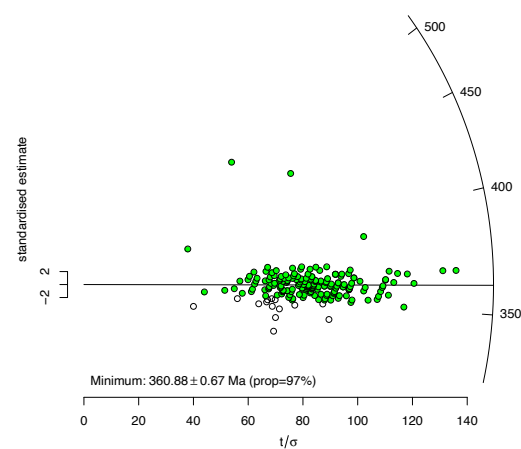*Wolverine Lake Gp*

99MC033

central age =  $354.55 \pm 0.90$  (n=141)  
 MSWD = 1.4,  $p(\chi^2) = 0.00064$   
 dispersion =  $0.83 \pm 0.32\%$

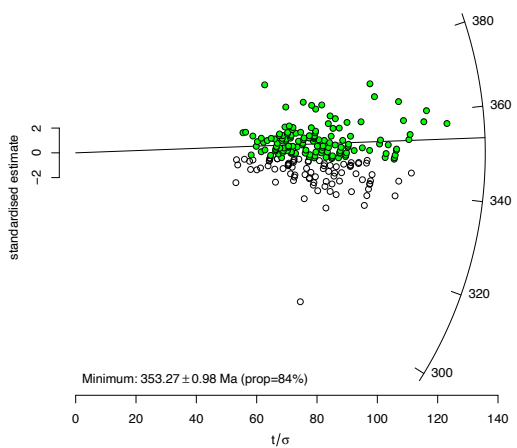

01MC265

central age =  $355.66 \pm 1.14$  (n=107)  
 MSWD = 2.4,  $p(\chi^2) = 2.6e-14$   
 dispersion =  $1.25 \pm 0.30\%$

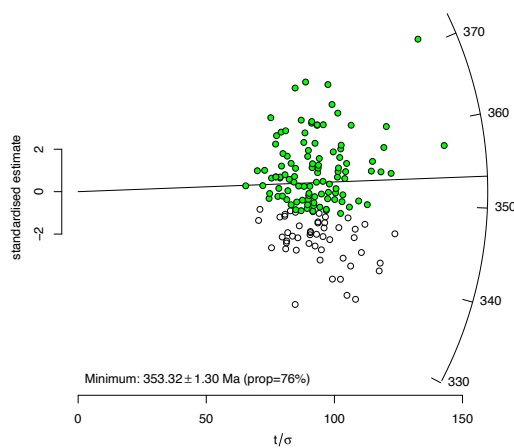*Drury formation**Finlayson assemblage*

Figure S4 – part 3

# Klinkit assemblage

00JN1-1

central age =  $1691 \pm 125$  (n=247)  
 MSWD = 4100,  $p(\chi^2) = 0$   
 dispersion =  $58.29 \pm 5.25\%$

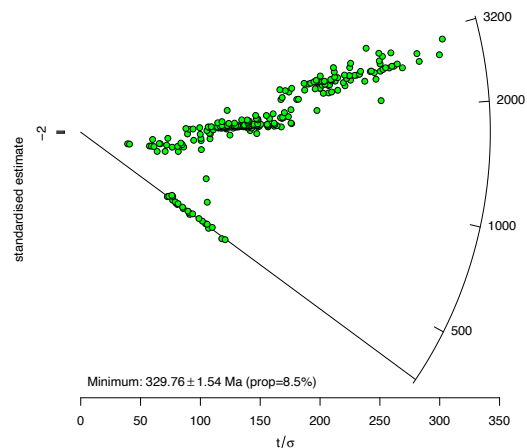

99MC079

central age =  $472.2 \pm 39.1$  (n=247)  
 MSWD = 6800,  $p(\chi^2) = 0$   
 dispersion =  $65.01 \pm 5.85\%$

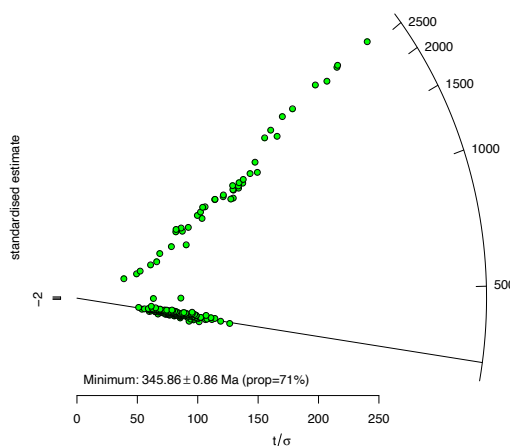

19MC029

central age =  $348.44 \pm 1.08$  (n=204)  
 MSWD = 5.3,  $p(\chi^2) = 0$   
 dispersion =  $1.97 \pm 0.24\%$

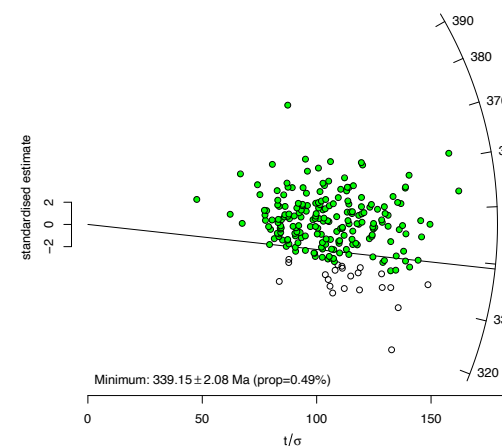

19MC008

central age =  $1007.0 \pm 94.8$  (n=332)  
 MSWD = 14000,  $p(\chi^2) = 0$   
 dispersion =  $85.74 \pm 6.66\%$

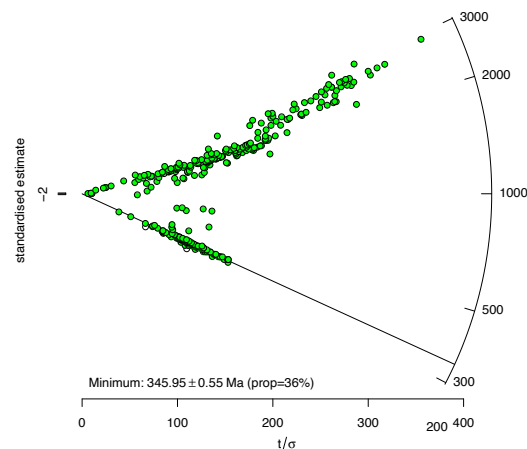

04MC133

central age =  $507.5 \pm 52.0$  (n=161)  
 MSWD = 6700,  $p(\chi^2) = 0$   
 dispersion =  $64.96 \pm 7.24\%$

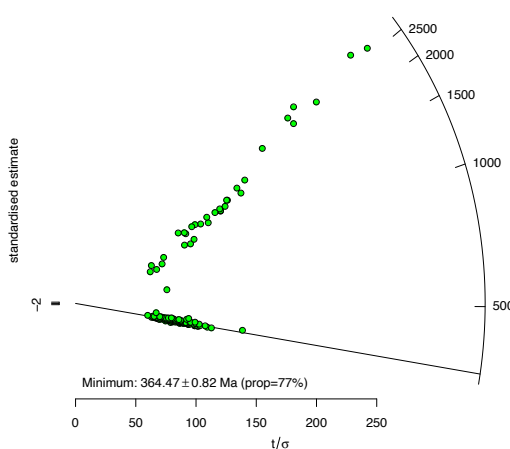

18MC022

central age =  $1927.4 \pm 32.0$  (n=282)  
 MSWD = 1400,  $p(\chi^2) = 0$   
 dispersion =  $27.89 \pm 1.18\%$

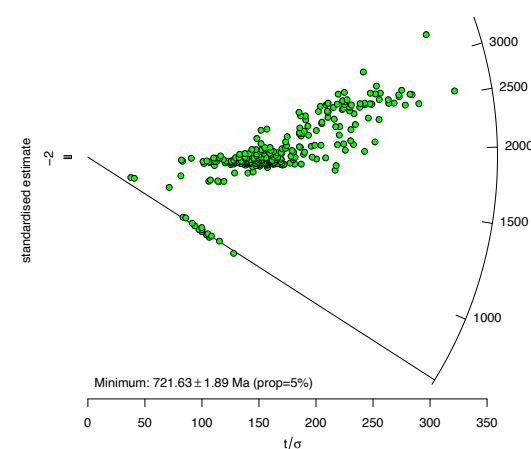

Supplement: Supplementary file 2 [file 1]
