# Supplementary material
Source: publisher figshare collection journal article supplement (https://gsapubs.figshare.com/articles/dataset/_/22596808)
Supplement: Supplementary file 1 [file 1]

## Sheet: Table DR2 Hf data
Table S2. Hf isotopic data.
Order	Sample	(176Yb + 176Lu) / 176Hf (%)	Volts Hf	176Hf/177Hf	± (1s)	176Lu/177Hf	176Hf/177Hf (T)	E-Hf (0)	E-Hf (0) ± (1s)	E-Hf (T)	Age (Ma)
SNOWCAP
154	COLPRON 04MC155 SPOT 102	11.6806	4.25479	0.282295	1.55663e-05	0.00070885	0.282284	-17.3432	0.550464	-0.716477	760.3		Kroeger, E.D.L., McClelland, W.C., Colpron, M., Piercey, S.J., and Gehrels, G.E., 2023, Detrital zircon U-Pb and Hf isotope signature of Carboniferous and older strata of the Yukon-Tanana terrane in Yukon, Canadian Cordillera: Implications for terrane correlations and the onset of Late Devonian arc magmatism: Geosphere, v. 19, https://doi.org/10.1130/GES02607.1.
155	COLPRON 04MC155 SPOT 110	17.5682	3.811	0.282089	1.59253e-05	0.00106779	0.28206	-24.6114	0.563161	6.94053	1448.2
156	COLPRON 04MC155 SPOT 219	15.5605	4.42336	0.281941	1.59305e-05	0.00092642	0.281915	-29.8345	0.563344	2.76786	1490
157	COLPRON 04MC155 SPOT 174	15.7079	3.90214	0.281748	1.69128e-05	0.00086984	0.28172	-36.6869	0.59808	-0.691304	1640.5
158	COLPRON 04MC155 SPOT 109	13.0958	4.28211	0.28189	1.92288e-05	0.000757231	0.281867	-31.6458	0.67998	4.5669	1643.8
160	COLPRON 04MC155 SPOT 197	8.22389	4.6018	0.281619	1.40425e-05	0.000521896	0.281601	-41.2402	0.49658	-1.18365	1803.7
161	COLPRON 04MC155 SPOT 207	10.0878	2.34245	0.281195	2.47986e-05	0.00067528	0.281171	-56.237	0.87694	-15.9729	1823.9
162	COLPRON 04MC155 SPOT 59	8.18321	4.32109	0.28139	1.55908e-05	0.000511519	0.281372	-49.3449	0.551332	-8.71029	1830.1
164	COLPRON 04MC155 SPOT 53	0.703079	3.74578	0.281833	1.97571e-05	7.16117e-05	0.281831	-33.6618	0.698662	7.75802	1837.8
165	COLPRON 04MC155 SPOT 180	10.8116	3.64445	0.281496	2.39316e-05	0.000773486	0.281469	-45.5979	0.846282	-5.02125	1841.2
166	COLPRON 04MC155 SPOT 266	8.66917	3.66948	0.281481	2.27028e-05	0.000540884	0.281462	-46.1196	0.802828	-5.22449	1842.6
167	COLPRON 04MC155 SPOT 60	11.6325	4.30959	0.281471	1.72218e-05	0.000710614	0.281446	-46.4547	0.609008	-5.70207	1845.7
168	COLPRON 04MC155 SPOT 279	12.0469	3.70196	0.281836	1.81963e-05	0.000763785	0.281809	-33.5625	0.643469	7.24551	1848.7
169	COLPRON 04MC155 SPOT 14	6.48994	4.05261	0.281472	1.82764e-05	0.000438194	0.281456	-46.4487	0.646299	-5.23172	1851.2
170	COLPRON 04MC155 SPOT 57	6.66723	3.97661	0.2814	1.20478e-05	0.000409981	0.281386	-48.9709	0.426042	-7.42197	1864.7
171	COLPRON 04MC155 SPOT 70	6.30361	4.07448	0.281393	1.86928e-05	0.000392155	0.281378	-49.2383	0.661025	-5.85085	1944.4
172	COLPRON 04MC155 SPOT 182	2.70722	4.40202	0.281441	1.96597e-05	0.000244719	0.28143	-47.5337	0.695218	4.19552	2298
173	COLPRON 04MC155 SPOT 169	9.20893	3.6093	0.281412	1.84401e-05	0.000589583	0.281386	-48.5683	0.652089	2.97727	2313.7
174	COLPRON 04MC155 SPOT 203	7.48816	3.72633	0.281093	1.48707e-05	0.000451592	0.281072	-59.8192	0.525866	-3.21531	2526.7
175	COLPRON 04MC155 SPOT 150	7.26946	4.24361	0.281144	1.90071e-05	0.000511016	0.281119	-58.0262	0.672139	0.159331	2599.3
176	COLPRON 04MC155 SPOT 47	10.7425	3.83214	0.281125	1.73775e-05	0.00070609	0.281089	-58.7019	0.614512	0.966199	2679.1
177	COLPRON 04MC155 SPOT 30	42.3907	2.57952	0.281277	2.5067e-05	0.00249714	0.281148	-53.3375	0.886435	3.56654	2700.8
178	COLPRON 04MC155 SPOT 3	9.9606	3.80857	0.281223	1.37132e-05	0.000701646	0.281186	-55.2489	0.484935	5.69959	2733.5
212	19MC025 33	34.1684	3.42413	0.282215	3.99789e-05	0.00158786	0.282196	-20.1598	1.41376	-6.57882	639.247
213	19MC025 104	10.0468	3.71153	0.281138	1.86531e-05	0.000663563	0.281104	-58.2332	0.659622	2.00327	2700.39
214	19MC025 122	5.08766	5.00169	0.280956	3.0284e-05	0.000322601	0.280941	-64.6909	1.07092	-11.6122	2365.77
215	19MC025 131	20.1567	5.41963	0.282372	3.12918e-05	0.00139511	0.282354	-14.6162	1.10656	-0.191691	674.208
216	19MC025 134	29.601	3.08049	0.282528	4.35664e-05	0.00168432	0.282505	-9.09732	1.54062	6.0859	715.364
217	19MC025 138	10.1712	3.90609	0.282239	2.59768e-05	0.000661057	0.282224	-19.3159	0.918607	6.53002	1174.76
218	19MC025 154	13.627	3.58449	0.281507	3.20625e-05	0.000875112	0.281473	-45.2059	1.13381	-1.06798	2005.2
219	19MC025 177	30.2369	3.70025	0.282498	3.26694e-05	0.0014435	0.282478	-10.1663	1.15527	5.00911	709.753
220	19MC025 190	18.8592	4.38651	0.282047	3.0855e-05	0.00110184	0.28201	-26.0821	1.09111	12.8274	1781.21
221	19MC025 251	24.0599	4.04176	0.282401	3.3063e-05	0.00119942	0.282385	-13.5654	1.16919	2.20109	731.9
222	19MC025 285	26.7627	3.87989	0.28234	3.72386e-05	0.00138297	0.282322	-15.7468	1.31685	-0.828257	696.935
223	19MC025 304	12.7202	4.6685	0.282438	2.1963e-05	0.000651574	0.282429	-12.2729	0.776667	3.76367	731.922
224	19MC025 307	14.3538	3.98381	0.282228	3.37199e-05	0.000751454	0.282218	-19.7095	1.19242	-5.51082	651.123
225	19MC025 77	15.4229	4.46267	0.281715	4.01829e-05	0.000902158	0.281684	-37.8222	1.42097	2.57808	1839.1
226	19MC025 330	16.8234	4.53812	0.28196	3.08142e-05	0.00100971	0.281926	-29.1614	1.08967	10.3768	1804.93
227	19MC025 346	18.4815	5.92075	0.282308	3.23494e-05	0.00111401	0.282292	-16.8715	1.14396	-0.540129	756.168
228	19MC025 367	29.351	4.44584	0.28169	3.33614e-05	0.00170188	0.28163	-38.7177	1.17974	0.967877	1852.01
229	19MC025 376	26.3419	5.41787	0.282304	4.08064e-05	0.00139476	0.282286	-17.0271	1.44302	-2.8295	663.84
230	19MC025 395	30.249	4.30388	0.282428	2.48935e-05	0.00208334	0.282404	-12.6385	0.880297	0.010284	604.525
231	19MC025 407	20.1596	4.64596	0.2824	4.61334e-05	0.00108296	0.282387	-13.6021	1.6314	0.825924	667.857
232	19MC025 426	14.8279	3.82396	0.281545	3.28944e-05	0.000893122	0.281514	-43.8502	1.16323	-3.65991	1830.36
233	19MC025 429	27.4463	4.60475	0.282392	4.16452e-05	0.00139602	0.282373	-13.9068	1.47268	1.58895	723.829
234	19MC025 476	8.81284	4.4469	0.282427	3.4923e-05	0.000538299	0.28242	-12.6432	1.23497	3.56302	737.108
235	19MC025 492	40.1944	3.47575	0.282462	4.04597e-05	0.00176755	0.282438	-11.4226	1.43076	3.7575	717.253
236	19MC025 534	11.8315	4.57874	0.282385	3.31386e-05	0.000625527	0.282376	-14.1533	1.17187	2.16032	744.014
237	19MC025 566	20.5826	3.09989	0.282133	2.91013e-05	0.00109341	0.282119	-23.0653	1.0291	-8.20986	688.372
238	19MC025 571	7.66678	3.52493	0.281818	2.8805e-05	0.000457459	0.281801	-34.2056	1.01862	7.50825	1871.87
239	19MC025 579	12.4142	4.11535	0.28127	2.94602e-05	0.000752398	0.281234	-53.5591	1.04179	2.19046	2510.45
240	19MC025 581	18.1909	5.37083	0.282388	3.31158e-05	0.000927366	0.282375	-14.0343	1.17106	2.08448	741.951
241	19MC025 597	20.0883	3.86952	0.281472	2.45352e-05	0.00112918	0.281432	-46.4438	0.867627	-6.2247	1845.24
380	19MC027 Spot 9	8.50098	4.42633	0.281589	1.0582e-05	0.000577841	0.281569	-42.2921	0.374206	-2.25173	1806.23
381	19MC027 Spot 27	29.7508	3.76726	0.281923	3.29897e-05	0.00171852	0.281905	-30.4818	1.1666	-18.9735	545.103
382	19MC027 Spot 49	9.4932	4.90519	0.281509	2.19974e-05	0.000628202	0.281487	-45.1126	0.777885	-3.02638	1899.91
383	19MC027 Spot 72	2.60065	5.16395	0.281532	1.77937e-05	0.000156726	0.281527	-44.3187	0.62923	-5.01101	1752.19
384	19MC027 Spot 87	19.5275	4.74077	0.281483	2.31151e-05	0.00118482	0.281441	-46.0566	0.81741	-5.74166	1852.6
385	19MC027 Spot 92	11.2088	6.02788	0.281203	2.93872e-05	0.000803379	0.281164	-55.9583	1.03921	-0.365492	2508
386	19MC027 Spot 108	18.4276	4.06725	0.281523	5.32995e-05	0.00116435	0.281478	-44.6389	1.88481	-0.998826	2000.37
387	19MC027 Spot 142	8.69843	5.72965	0.281341	2.55598e-05	0.000526443	0.281318	-51.0485	0.90386	0.560398	2312.77
388	19MC027 Spot 158	17.4842	4.9574	0.281613	3.07859e-05	0.00100504	0.281579	-41.4346	1.08867	-2.48264	1780.68
389	19MC027 Spot 172	16.9508	4.2898	0.281476	3.32073e-05	0.00100802	0.281442	-46.3029	1.17429	-7.80827	1761.22
390	19MC027 Spot 190	8.17108	5.74043	0.281581	2.72488e-05	0.000671392	0.281552	-42.5728	0.963587	8.3392	2290.27
391	19MC027 Spot 235	16.9087	5.33135	0.281738	2.54428e-05	0.000992323	0.281706	-37.0154	0.899722	0.636807	1721
392	19MC027 Spot 250	15.679	6.30862	0.281545	2.91029e-05	0.000907415	0.28151	-43.8572	1.02915	0.0405801	1996.21
393	19MC027 Spot 322	15.2118	5.61987	0.281115	1.78545e-05	0.000860307	0.281072	-59.0703	0.63138	-1.99236	2578.21
394	19MC027 Spot 364	9.54754	5.1279	0.281256	2.05051e-05	0.000598727	0.281229	-54.0733	0.725113	-2.722	2307.17
395	19MC027 Spot 366	11.7015	4.5627	0.281133	1.35981e-05	0.000680559	0.281103	-58.4163	0.480863	-7.11477	2311.61
396	19MC027 Spot 397	9.88968	4.34783	0.28129	2.3379e-05	0.000629923	0.281259	-52.8548	0.82674	4.6042	2575.59
397	19MC027 Spot 400	14.6802	4.97188	0.28124	2.52663e-05	0.000917682	0.281195	-54.6288	0.89348	2.55326	2586.06
398	19MC027 Spot 435	17.1245	3.84965	0.282288	2.65616e-05	0.00096806	0.282278	-17.5608	0.939285	-5.3922	562.198
399	19MC027 Spot 467	0.719769	6.14855	0.281154	2.40859e-05	3.85714e-05	0.281153	-57.6669	0.85174	-16.2613	1839.75
400	19MC027 Spot 481	7.48567	4.97479	0.281267	2.52312e-05	0.00046552	0.281246	-53.6955	0.892239	-2.18574	2304.89
401	19MC027 Spot 515	9.99926	4.5389	0.281214	2.87427e-05	0.000612999	0.281185	-55.5397	1.01642	0.396756	2508.71
402	19MC027 Spot 521	5.06175	6.78972	0.281211	2.08201e-05	0.000355858	0.281194	-55.6431	0.736252	2.40925	2581.14
403	19MC027 Spot 545	29.6376	2.86519	0.282304	3.26357e-05	0.00173819	0.282278	-17.0018	1.15408	-0.284321	788.969
262	19MC030 41	34.9722	5.14046	0.281656	4.76062e-05	0.00182747	0.281592	-39.9203	1.68348	-0.815236	1832.82
263	19MC030 94	9.5195	7.06983	0.281562	3.93415e-05	0.000643254	0.281539	-43.2516	1.39121	-1.01147	1907.2
264	19MC030 172	18.3602	6.03686	0.281713	3.43138e-05	0.00113053	0.281674	-37.9041	1.21342	2.25407	1840.98
265	19MC030 198	7.61184	5.44125	0.281427	3.44511e-05	0.00047481	0.281409	-48.035	1.21828	-3.43708	2002.11
266	19MC030 206	6.34413	4.6454	0.281245	1.95722e-05	0.000382278	0.281231	-54.4502	0.692124	-11.5503	1923.5
267	19MC030 293	8.24023	5.18689	0.28122	2.66999e-05	0.000508188	0.281198	-55.3326	0.944177	-4.02046	2299.56
268	19MC030 320	15.281	5.54115	0.281559	3.17268e-05	0.00102328	0.281521	-43.3457	1.12194	-0.15201	1971.68
269	19MC030 322	7.85117	4.61287	0.281452	3.13626e-05	0.000447583	0.281436	-47.1355	1.10906	-5.35305	1876.74
270	19MC030 339	9.09211	4.59821	0.281512	2.46987e-05	0.00050804	0.281494	-45.0304	0.873408	-3.57982	1865.12
271	19MC030 375	8.35238	5.36884	0.281388	2.91497e-05	0.000507878	0.281366	-49.3933	1.03081	2.29794	2314.71
272	19MC030 411	12.7301	5.32096	0.281357	1.93396e-05	0.00079178	0.281323	-50.4898	0.683898	-0.437978	2262.46
273	19MC030 415	12.576	4.59273	0.281009	2.45862e-05	0.000731102	0.280975	-62.7869	0.869431	-8.44129	2449.7
274	19MC030 426	10.3163	6.61158	0.281447	3.22678e-05	0.000796954	0.281421	-47.3086	1.14107	-9.95967	1699.14
275	19MC030 433	9.83132	4.39026	0.281079	3.29929e-05	0.000594026	0.281048	-60.3425	1.16671	-1.02302	2655.61
276	19MC030 448	20.4108	4.20773	0.281594	4.82326e-05	0.00145253	0.281543	-42.1162	1.70563	-2.15193	1851.15
277	19MC030 452	22.3452	5.00214	0.281869	3.81003e-05	0.00159798	0.281814	-32.3774	1.34732	6.6783	1816.21
278	19MC030 481	11.1369	5.02666	0.281352	2.01493e-05	0.000603341	0.281325	-50.6915	0.712532	0.589054	2303.61
339	19MC051 26	13.704	3.90677	0.281475	3.00614e-05	0.000866532	0.28146	-46.3079	1.06305	-25.5178	875.991
340	19MC051 50	4.63312	5.25461	0.281277	2.33154e-05	0.000316095	0.281261	-53.3403	0.824493	4.01247	2547.39
341	19MC051 57	3.76064	3.71148	0.281853	2.76575e-05	0.000403187	0.281838	-32.9521	0.97804	10.3183	1936.81
342	19MC051 86	7.92223	5.16882	0.281667	2.04923e-05	0.000472194	0.281651	-39.5381	0.724661	0.117012	1783.1
343	19MC051 143	22.0098	1.99807	0.281643	0.000150466	0.00193446	0.281576	-40.3794	5.32086	-1.39813	1833.31
344	19MC051 218	8.10183	5.05279	0.281552	1.71905e-05	0.000532393	0.281533	-43.6098	0.6079	-2.58215	1847.56
345	19MC051 220	8.86279	4.23661	0.281445	2.66536e-05	0.000755535	0.281412	-47.3742	0.942539	3.71345	2304.83
346	19MC051 222	20.7857	5.08032	0.281237	3.26858e-05	0.00125259	0.281173	-54.7573	1.15585	2.97867	2636.81
347	19MC051 227	19.5779	5.93417	0.282153	3.65663e-05	0.00133574	0.282108	-22.3598	1.29308	15.5749	1749.21
348	19MC051 234	13.0127	4.92928	0.28123	2.37801e-05	0.000760896	0.281192	-54.9941	0.840925	2.00572	2566.12
349	19MC051 255	12.5909	5.51855	0.281374	2.36849e-05	0.000790069	0.281344	-49.8952	0.837559	-5.67229	2004.8
350	19MC051 341	4.54992	5.13169	0.281204	2.59879e-05	0.000293565	0.281189	-55.9036	0.918997	3.89154	2651.5
351	19MC051 418	21.3346	5.03198	0.281756	1.86002e-05	0.00127622	0.281711	-36.3798	0.657749	4.16994	1866.5
FINLAYSON
1	18MC016 SPOT 220	11.0041	6.34074	0.281146	1.92709e-05	0.000732078	0.281112	-57.945	0.681467	-4.14267	2424.7
2	18MC016 SPOT 218	23.9328	7.00027	0.282331	1.43935e-05	0.00146802	0.28232	-16.0676	0.508991	-7.69152	393.7
3	18MC016 SPOT 36	15.6707	6.27335	0.282206	1.51807e-05	0.000953931	0.2822	-20.4605	0.536827	-12.349	375.5
4	18MC016 SPOT 156	14.2751	4.95058	0.282303	1.82549e-05	0.00116181	0.282295	-17.038	0.64554	-8.99913	374.4
5	18MC016 SPOT 160	33.3931	6.69582	0.2824	1.71632e-05	0.00203079	0.282385	-13.6293	0.606933	-5.85159	372.1
6	18MC016 SPOT 223	36.0849	5.63292	0.282465	2.55685e-05	0.00225613	0.28245	-11.3075	0.904167	-3.59603	371.5
7	18MC016 SPOT 22	22.7858	7.41356	0.282338	1.26493e-05	0.00136067	0.282328	-15.8136	0.447312	-7.90238	370.7
8	18MC016 SPOT 43	66.5103	5.87406	0.282454	2.64623e-05	0.00339547	0.282429	-11.7023	0.935774	-3.76343	396.8
9	18MC016 SPOT 107	39.8698	8.46812	0.282308	1.70766e-05	0.00243752	0.282291	-16.8826	0.603872	-9.28459	368.4
10	18MC016 SPOT 180	15.6198	6.85059	0.282334	1.27718e-05	0.000935083	0.282327	-15.9509	0.451644	-8.00687	367.4
11	18MC016 SPOT 227	57.106	6.2394	0.282508	2.21345e-05	0.00369792	0.282482	-9.80984	0.782732	-2.55966	366.1
12	18MC016 SPOT 73	18.1982	5.28119	0.282294	2.06366e-05	0.00115544	0.282286	-17.3543	0.729764	-9.52113	364.8
13	18MC016 SPOT 270	22.1446	7.06236	0.282393	1.909e-05	0.00165365	0.282382	-13.8661	0.67507	-6.16337	364.2
14	18MC016 SPOT 213	21.6027	7.00955	0.282355	1.44746e-05	0.00117869	0.282347	-15.2056	0.51186	-7.47758	360.1
15	18MC016 SPOT 255	22.8179	6.53357	0.28234	1.93164e-05	0.00140866	0.28233	-15.7386	0.683078	-8.10658	358.2
16	18MC016 SPOT 145	21.6874	6.66581	0.282321	1.30807e-05	0.00136485	0.282312	-16.4015	0.462568	-8.76822	357.8
17	18MC016 SPOT 128	21.2659	6.84361	0.28235	1.31842e-05	0.00130267	0.282341	-15.3862	0.466227	-7.81895	354
18	18MC016 SPOT 243	20.0036	6.81723	0.282211	2.11047e-05	0.00125224	0.282203	-20.3008	0.746316	-12.8244	349.4
19	18MC016 SPOT 199	18.3417	6.84079	0.282321	1.36581e-05	0.00109588	0.282315	-16.3926	0.482985	-9.29586	330
20	18MC016 SPOT 209	33.4146	5.97716	0.282343	2.61433e-05	0.00213846	0.28233	-15.6438	0.924495	-9.14008	312.5
255	18MC-018 Spot 11	25.459	2.18617	0.282389	2.29837e-05	0.00132537	0.28238	-13.9907	0.812762	-5.59119	393
256	18MC-018 Spot 15	26.1634	2.85606	0.282272	2.76826e-05	0.00153426	0.282264	-18.13	0.978926	-11.6843	304
257	18MC-018 Spot 34	18.1851	2.02312	0.282323	2.08797e-05	0.00100675	0.282316	-16.3372	0.738361	-8.41999	367
258	18MC-018 Spot 42	35.786	3.45515	0.282356	2.56383e-05	0.00207236	0.282343	-15.1734	0.906634	-8.10154	339
259	18MC-018 Spot 60	19.0639	2.42951	0.282158	3.11995e-05	0.00106452	0.282151	-22.1589	1.1033	-14.5414	354
260	18MC-018 Spot 81	35.5698	3.06045	0.282291	4.30566e-05	0.00206924	0.282276	-17.484	1.52259	-9.8686	365
261	18MC-018 Spot 149	20.2297	2.42437	0.282379	1.97307e-05	0.00110942	0.282373	-14.3628	0.697728	-7.87193	302
263	18MC-018 Spot 184	10.9982	2.75471	0.282507	3.95927e-05	0.000741158	0.282501	-9.84292	1.4001	-1.59337	379
264	18MC-018 Spot 199	24.282	2.21374	0.282372	3.53883e-05	0.00135655	0.282363	-14.6122	1.25142	-7.14317	350
265	18MC-018 Spot 203	29.8561	2.64677	0.282152	4.7269e-05	0.00190286	0.282139	-22.3931	1.67155	-14.7624	364
266	18MC-018 Spot 206	23.2508	1.9244	0.28236	3.73258e-05	0.00127908	0.282351	-15.0351	1.31993	-7.24762	364
267	18MC-018 Spot 230	22.0851	2.21227	0.282266	4.7039e-05	0.00118389	0.282258	-18.3614	1.66342	-10.8982	348
268	18MC-018 Spot 233	17.7697	1.93928	0.282159	5.494e-05	0.00102734	0.282152	-22.1263	1.94282	-14.1107	372
269	18MC-018 Spot 235	11.2816	2.19431	0.282433	2.85058e-05	0.000648424	0.282429	-12.4403	1.00804	-4.41069	368
270	18MC-018 Spot 237	24.2655	2.82054	0.282356	2.47755e-05	0.0014192	0.282347	-15.1568	0.876124	-7.27494	370
271	18MC-018 Spot 245	12.7769	2.22917	0.282312	2.82599e-05	0.000728761	0.282307	-16.7306	0.999342	-8.94261	358
272	18MC-018 Spot 271	36.5447	2.18139	0.282362	2.70415e-05	0.00195928	0.282349	-14.9475	0.956256	-7.47165	357
273	18MC-018 Spot 302	18.61	2.28776	0.282324	3.31059e-05	0.00112742	0.282317	-16.2943	1.17071	-8.47118	364
1	18MC013 SPOT 192	22.1664	3.29007	0.282054	3.92241e-05	0.00179588	0.282043	-25.8471	1.38707	-18.9188	329.6
2	18MC013 SPOT 199	11.4436	6.22212	0.282149	1.62783e-05	0.000656476	0.282144	-22.5057	0.575641	-15.2561	332.8
3	18MC013 SPOT 246	20.3752	4.00088	0.282095	1.9471e-05	0.00119571	0.282087	-24.4024	0.688543	-16.944	348.1
4	18MC013 SPOT 168	17.3205	5.32982	0.282086	1.40368e-05	0.00100219	0.282079	-24.7284	0.496376	-16.862	364.9
6	18MC013 SPOT 14	16.6133	3.84597	0.281396	2.26699e-05	0.00104273	0.281389	-49.1212	0.801665	-41.3211	363.2
7	18MC013 SPOT 132	16.218	4.96231	0.282058	1.67795e-05	0.00120799	0.28205	-25.7144	0.593368	-17.8879	365.4
8	18MC013 SPOT 260	10.7995	4.30949	0.282096	1.83327e-05	0.00069415	0.282091	-24.3759	0.648291	-16.544	359.9
9	18MC013 SPOT 67	28.738	4.3585	0.281547	1.92831e-05	0.00185446	0.281535	-43.7615	0.6819	-36.1252	364.5
10	18MC013 SPOT 24	21.9423	5.63506	0.282187	1.78514e-05	0.00157954	0.282176	-21.1354	0.631271	-13.2249	373.4
11	18MC013 SPOT 176	22.5326	4.74039	0.282278	2.19511e-05	0.00166622	0.282266	-17.9439	0.776245	-10.36	358.9
12	18MC013 SPOT 157	13.9505	5.58964	0.28216	1.5465e-05	0.0009102	0.282153	-22.1148	0.546883	-14.2479	363.8
13	18MC013 SPOT 310	15.7039	5.36978	0.282062	1.38671e-05	0.000985871	0.282056	-25.5546	0.490375	-17.895	355.2
14	18MC013 SPOT 229	24.7301	5.0065	0.282196	1.50184e-05	0.00150443	0.282186	-20.8415	0.531087	-13.3856	351.2
15	18MC013 SPOT 68	30.1991	4.54708	0.282305	2.53303e-05	0.00191615	0.282293	-16.9592	0.895743	-9.46971	357.2
16	18MC013 SPOT 251	27.385	7.018	0.282146	1.29936e-05	0.00162975	0.282136	-22.5823	0.459488	-15.1484	351.6
17	18MC013 SPOT 188	20.8409	5.1833	0.282028	1.7318e-05	0.00126321	0.282019	-26.7723	0.612407	-19.1253	357.7
18	18MC013 SPOT 304	42.7945	4.75133	0.281784	3.03441e-05	0.00295001	0.281764	-35.3868	1.07304	-27.9129	369.2
19	18MC013 SPOT 305	21.9703	5.6278	0.282159	1.43015e-05	0.00134761	0.282149	-22.1402	0.505738	-14.1218	375.8
20	18MC013 SPOT 189	42.2566	6.40404	0.282238	1.77268e-05	0.00260318	0.28222	-19.3529	0.626866	-12.0692	355.2
21	18MC013 SPOT 109	24.6118	4.64653	0.282286	2.15971e-05	0.0021432	0.282271	-17.653	0.763727	-10.1657	359.7
24	18MC019 SPOT 73	25.3151	2.68147	0.282442	3.3055e-05	0.0016065	0.282431	-12.1404	1.16891	-4.60143	355.9
25	18MC019 SPOT 39	12.0042	6.53427	0.281717	2.35164e-05	0.000744162	0.281712	-37.7563	0.8316	-29.7269	370
26	18MC019 SPOT 164	30.8125	3.57662	0.281941	3.57734e-05	0.00228841	0.281925	-29.8613	1.26504	-22.25	367.8
27	18MC019 SPOT 79	15.5071	6.80904	0.28219	1.7018e-05	0.000950077	0.282184	-21.0284	0.601801	-13.0531	369.2
28	18MC019 SPOT 26	22.4497	5.9019	0.282257	1.47468e-05	0.00144557	0.282247	-18.688	0.521485	-11.0672	358.2
29	18MC019 SPOT 135	9.89545	6.04373	0.282105	1.35753e-05	0.00061282	0.282101	-24.0289	0.480058	-16.1707	360.2
30	18MC019 SPOT 54	22.6531	6.90932	0.282192	1.18219e-05	0.00143863	0.282182	-20.9773	0.418054	-13.2967	361
31	18MC019 SPOT 138	14.2677	5.70503	0.282088	1.65039e-05	0.000877009	0.282082	-24.6455	0.583621	-16.8226	361.5
32	18MC019 SPOT 146	28.947	4.22994	0.282351	2.38253e-05	0.0020777	0.282336	-15.3497	0.842525	-7.51583	375.4
33	18MC019 SPOT 101	35.9028	4.21025	0.281918	2.71712e-05	0.00208161	0.281904	-30.6659	0.960843	-23.1994	358.5
34	18MC019 SPOT 152	22.9704	5.58286	0.282306	1.88788e-05	0.00143932	0.282296	-16.9552	0.667602	-9.20752	364
35	18MC019 SPOT 35	34.9883	4.73815	0.282318	1.80567e-05	0.00223933	0.282303	-16.5252	0.638531	-9.14738	355.5
36	18MC019 SPOT 112	21.3967	6.33946	0.282231	1.34529e-05	0.00136678	0.282222	-19.5924	0.475727	-11.9406	358.8
37	18MC019 SPOT 124	26.0736	7.7747	0.281589	1.60338e-05	0.00169525	0.281578	-42.2986	0.566995	-35.2506	334.8
38	18MC019 SPOT 174	30.9748	4.02415	0.281665	2.85224e-05	0.00184729	0.281652	-39.6211	1.00863	-31.8576	370.3
39	18MC019 SPOT 160	22.6695	5.19207	0.282284	1.63136e-05	0.00138251	0.282275	-17.7002	0.576891	-10.0764	357.6
40	18MC019 SPOT 154	23.4661	5.97183	0.282286	1.79729e-05	0.00142447	0.282276	-17.64	0.635567	-9.89777	363.6
41	18MC019 SPOT 176	17.8914	5.32259	0.282278	2.19034e-05	0.00109136	0.28227	-17.9416	0.77456	-10.0999	364.5
42	18MC019 SPOT 169	17.7648	6.01257	0.282108	1.31786e-05	0.00107921	0.282101	-23.9352	0.466029	-16.0846	365
43	18MC019 SPOT 104	14.7868	5.38116	0.282167	1.97082e-05	0.000999797	0.282161	-21.8409	0.696932	-13.9607	365.4
44	18MC019 SPOT 136	18.9981	6.15114	0.282073	1.70385e-05	0.00113884	0.282065	-25.1854	0.602525	-17.3848	363.4
45	18MC019 SPOT 36	20.9092	5.81818	0.282158	1.29262e-05	0.00124712	0.28215	-22.1675	0.457103	-14.3217	366.6
46	18MC019 SPOT 113	21.2845	6.60809	0.28216	1.56629e-05	0.00129304	0.282151	-22.1041	0.553879	-14.1342	372.9
24	18MC020 SPOT 120	19.7989	3.23928	0.282391	3.1562e-05	0.0013284	0.282383	-13.9356	1.11611	-6.89003	329.9
25	18MC020 SPOT 312	42.2912	5.39212	0.282247	2.88096e-05	0.00310337	0.282228	-19.0163	1.01878	-12.2795	334
27	18MC020 SPOT 151	24.1379	4.50327	0.282148	3.3716e-05	0.00186121	0.282136	-22.5112	1.19229	-15.1649	350
28	18MC020 SPOT 260	20.0265	6.04119	0.282189	1.21244e-05	0.0012579	0.28218	-21.0852	0.42875	-13.5656	351.5
30	18MC020 SPOT 249	16.1315	6.9537	0.28203	1.06437e-05	0.00104751	0.282023	-26.6874	0.376389	-18.8768	362.9
31	18MC020 SPOT 199	12.2576	4.88559	0.282342	1.41854e-05	0.00118387	0.282333	-15.6798	0.501632	-7.79183	367.6
32	18MC020 SPOT 149	11.5999	6.17947	0.282408	9.6485e-06	0.000706954	0.282403	-13.3437	0.341196	-5.47756	361.2
33	18MC020 SPOT 218R	25.5328	6.65775	0.282226	1.673e-05	0.00170746	0.282214	-19.7722	0.591615	-12.1847	359.6
34	18MC020 SPOT 124	18.8199	5.41388	0.282272	1.14476e-05	0.00120457	0.282264	-18.129	0.404815	-10.416	359.8
35	18MC020 SPOT 38	12.9233	7.55185	0.281519	2.0944e-05	0.000714005	0.281514	-44.7614	0.740632	-36.9484	360
36	18MC020 SPOT 191	15.5346	4.88065	0.282219	1.45537e-05	0.000966195	0.282212	-20.0103	0.514655	-11.83	378.8
37	18MC020 SPOT 19	20.3543	4.9685	0.28246	1.97105e-05	0.00145694	0.28245	-11.4891	0.697014	-3.81599	360.5
38	18MC020 SPOT 299	94.2708	3.66535	0.282278	2.52727e-05	0.00370149	0.282253	-17.9169	0.893707	-10.6464	367.5
39	18MC020 SPOT 23	30.0553	4.52739	0.282351	2.6461e-05	0.00213286	0.282337	-15.3461	0.935727	-7.8523	359.8
40	18MC020 SPOT 263	27.531	5.43171	0.282175	1.53346e-05	0.00164919	0.282163	-21.5884	0.542271	-13.9227	362.7
41	18MC020 SPOT 53	18.4455	6.24984	0.282034	1.53935e-05	0.00108941	0.282026	-26.5654	0.544353	-18.8253	360.1
42	18MC020 SPOT 243	27.5495	4.42661	0.282307	2.07516e-05	0.002622	0.282289	-16.9151	0.733828	-9.68124	352.9
43	18MC020 SPOT 308	15.4777	6.07133	0.282111	1.56126e-05	0.000981304	0.282105	-23.8227	0.552102	-16.1325	356.5
44	18MC020 SPOT 104	19.6525	5.99904	0.281942	1.34371e-05	0.00121296	0.281934	-29.7999	0.475169	-22.0295	363
45	18MC020 SPOT 26	17.3288	5.95897	0.28216	1.38935e-05	0.0011934	0.282152	-22.112	0.49131	-14.5868	351.1
46	18MC020 SPOT 237	36.5936	4.09602	0.282321	2.51961e-05	0.00254679	0.282304	-16.4021	0.890998	-9.12757	354
47	18MC020 SPOT 196	121.531	5.01973	0.282257	6.16961e-05	0.00534179	0.28222	-18.6839	2.18173	-11.8569	365.2
1	COLPRON 99MC033 SPOT 78	12.5148	3.21028	0.28241	1.48145e-05	0.000838224	0.282406	-13.2542	0.52388	-6.79723	297.9
2	COLPRON 99MC033 SPOT 262	8.77667	3.23879	0.282483	2.07565e-05	0.000579008	0.282479	-10.6781	0.734003	-3.38946	333.4
3	COLPRON 99MC033 SPOT 260	10.2306	3.13185	0.282453	1.55238e-05	0.000684117	0.282448	-11.7551	0.548963	-4.37241	338.8
4	COLPRON 99MC033 SPOT 303	17.2271	2.75815	0.282543	2.15625e-05	0.00124564	0.282535	-8.56544	0.762505	-1.25692	341.1
5	COLPRON 99MC033 SPOT 86	10.6606	3.27426	0.282489	1.86919e-05	0.00078674	0.282484	-10.4579	0.660992	-3.01219	342.7
6	COLPRON 99MC033 SPOT 137	15.0863	3.08218	0.282358	1.84976e-05	0.00105069	0.282351	-15.1081	0.654122	-7.70859	343.5
7	COLPRON 99MC033 SPOT 98	10.1349	3.30554	0.282471	1.78753e-05	0.000758468	0.282467	-11.0881	0.632117	-3.58624	345
8	COLPRON 99MC033 SPOT 234	9.53602	3.53037	0.282523	1.64312e-05	0.000711976	0.282518	-9.26815	0.581048	-1.72144	346.5
9	COLPRON 99MC033 SPOT 84	17.2454	3.16718	0.282588	1.83869e-05	0.00125864	0.28258	-6.95788	0.650209	0.490874	347.7
11	COLPRON 99MC033 SPOT 111	10.4814	3.66535	0.282505	1.69348e-05	0.000825954	0.282499	-9.905	0.598859	-2.32176	349.4
12	COLPRON 99MC033 SPOT 286	24.3984	3.10005	0.28257	2.01623e-05	0.00173167	0.282559	-7.58868	0.712991	-0.183742	350.8
13	COLPRON 99MC033 SPOT 63	17.5102	2.92475	0.282447	2.07259e-05	0.00135509	0.282438	-11.9522	0.73292	-4.43311	352.2
14	COLPRON 99MC033 SPOT 116	22.2178	3.00601	0.282504	2.27438e-05	0.00164586	0.282493	-9.93044	0.80428	-2.46701	352.7
15	COLPRON 99MC033 SPOT 49	15.3486	3.19288	0.282552	2.11058e-05	0.00111453	0.282545	-8.22921	0.746357	-0.603481	354.4
16	COLPRON 99MC033 SPOT 18	17.9149	2.84306	0.282825	2.36402e-05	0.00142204	0.282816	1.42308	0.835978	9.03774	356.9
17	COLPRON 99MC033 SPOT 58	18.2389	2.86633	0.282515	2.49987e-05	0.00139535	0.282505	-9.56292	0.884018	-1.93141	357.8
18	COLPRON 99MC033 SPOT 149	18.7574	3.23024	0.282512	1.95564e-05	0.00132682	0.282503	-9.66186	0.691564	-2.00129	358.4
19	COLPRON 99MC033 SPOT 105	17.8994	2.77573	0.282476	2.00245e-05	0.00133424	0.282467	-10.9437	0.708119	-3.24081	360.5
20	COLPRON 99MC033 SPOT 96	9.69939	3.10223	0.282555	1.76961e-05	0.000728981	0.28255	-8.14158	0.625779	-0.217481	363.9
71	COLPRON 01MC-265 SPOT 36	19.513	3.78309	0.282343	1.87016e-05	0.00143803	0.282334	-15.6436	0.661337	-8.61469	330.3
72	COLPRON 01MC-265 SPOT 31	7.68392	4.21667	0.282278	1.24351e-05	0.000593601	0.282274	-17.9266	0.439736	-10.4756	341.2
73	COLPRON 01MC-265 SPOT 46	15.552	3.74825	0.282321	1.75433e-05	0.00115952	0.282314	-16.3964	0.620377	-9.0183	343.7
74	COLPRON 01MC-265 SPOT 166	11.8899	3.36509	0.282263	1.51101e-05	0.000883541	0.282257	-18.4655	0.534332	-11.0044	344.7
75	COLPRON 01MC-265 SPOT 43	18.3015	3.98294	0.282274	2.18523e-05	0.00145245	0.282264	-18.0834	0.772752	-10.7157	346.4
76	COLPRON 01MC-265 SPOT 70	12.0257	3.51975	0.282319	1.40716e-05	0.000865168	0.282313	-16.492	0.497609	-8.95996	347.7
77	COLPRON 01MC-265 SPOT 140	13.6291	4.26448	0.282344	2.30379e-05	0.00103649	0.282337	-15.6096	0.814681	-8.1077	348.1
78	COLPRON 01MC-265 SPOT 88	16.1271	3.46351	0.282541	2.40095e-05	0.00105206	0.282534	-8.64187	0.849036	-1.12517	348.7
79	COLPRON 01MC-265 SPOT 86	8.3159	3.72845	0.282314	1.9108e-05	0.000643725	0.28231	-16.6423	0.675707	-9.00675	350.1
80	COLPRON 01MC-265 SPOT 49	19.5922	4.16239	0.28227	1.56891e-05	0.00139103	0.282261	-18.209	0.554806	-10.7332	350.8
81	COLPRON 01MC-265 SPOT 23	14.9363	3.79073	0.282317	1.88252e-05	0.00137091	0.282308	-16.551	0.665706	-9.03916	352.2
82	COLPRON 01MC-265 SPOT 90	16.9989	3.50264	0.28237	1.93004e-05	0.00124329	0.282362	-14.679	0.682511	-7.10587	353.6
83	COLPRON 01MC-265 SPOT 63	16.1407	3.5043	0.282327	1.99141e-05	0.00119768	0.282319	-16.202	0.704213	-8.59777	354.6
84	COLPRON 01MC-265 SPOT 7	11.0508	4.53883	0.282315	2.29399e-05	0.000997574	0.282309	-16.6124	0.811213	-8.95495	354.9
85	COLPRON 01MC-265 SPOT 127	11.9263	3.62986	0.282329	1.55376e-05	0.000868961	0.282323	-16.1387	0.549448	-8.42456	356.1
87	COLPRON 01MC-265 SPOT 33	10.8946	4.86582	0.28234	1.32265e-05	0.000806791	0.282335	-15.7322	0.467724	-7.96381	357.9
88	COLPRON 01MC-265 SPOT 181	19.1299	3.98994	0.28226	1.97557e-05	0.00141037	0.282251	-18.5548	0.698612	-10.8421	362.1
89	COLPRON 01MC-265 SPOT 168	22.3089	4.16378	0.282304	2.32501e-05	0.00215889	0.282289	-17.0051	0.822182	-9.41435	364.8
90	COLPRON 01MC-265 SPOT 161	18.6222	3.70004	0.282189	1.73226e-05	0.00152739	0.282178	-21.0811	0.612571	-13.1747	372.6
UNCERTAIN UNIT
192	19MC023 13	11.3729	4.77382	0.282249	2.86652e-05	0.000621466	0.282241	-18.9506	1.01368	-3.14813	721.161
193	19MC023 28	15.9665	5.60498	0.282399	2.64256e-05	0.00101482	0.282386	-13.6413	0.934475	1.80993	713.345
194	19MC023 78	9.55376	4.64332	0.282249	3.96566e-05	0.000672048	0.28224	-18.9712	1.40236	-4.82365	647.188
195	19MC023 84	17.5401	5.58706	0.282289	1.97557e-05	0.000902685	0.282277	-17.5252	0.698612	-1.94708	716.988
196	19MC023 87	22.1074	7.8545	0.282334	2.41119e-05	0.00149437	0.282314	-15.9383	0.85266	-0.442691	726.181
197	19MC023 122	13.4552	5.71872	0.28235	1.90523e-05	0.000868029	0.282339	-15.3869	0.673736	-1.02692	660.505
198	19MC023 164	11.7693	4.8585	0.282283	2.36005e-05	0.000666421	0.282274	-17.7411	0.834573	-1.99503	719.496
199	19MC023 185	8.25224	5.942	0.281383	3.13105e-05	0.000492475	0.281365	-49.5646	1.10722	-5.03073	2000.65
200	19MC023 211	23.5327	5.09293	0.282236	2.4038e-05	0.00129551	0.282219	-19.4227	0.850044	-4.86283	678.733
201	19MC023 258	7.75353	4.80568	0.281302	3.46065e-05	0.000450667	0.281286	-52.4318	1.22377	-9.91594	1910.15
202	19MC023 315	13.8614	4.96326	0.282428	2.47936e-05	0.000838497	0.282418	-12.6141	0.876766	1.29525	639.179
203	19MC023 336	8.9773	4.48251	0.281066	2.7268e-05	0.000548961	0.281038	-60.775	0.964266	-0.424437	2696.87
204	19MC023 341	16.2898	5.7849	0.281511	2.78297e-05	0.00100859	0.281476	-45.0413	0.98413	-4.69427	1843.98
205	19MC023 358	8.28136	5.08947	0.282297	2.46515e-05	0.000511908	0.282291	-17.247	0.871739	-2.64472	664.495
207	19MC023 414	22.9975	4.81156	0.282367	2.93164e-05	0.00122467	0.282349	-14.7946	1.0367	1.5051	757.119
208	19MC023 457	13.3933	6.0472	0.282405	3.29776e-05	0.000712815	0.282395	-13.4515	1.16617	2.38167	724.141
209	19MC023 515	16.7947	5.30289	0.28231	2.18986e-05	0.000790493	0.2823	-16.7882	0.774391	-1.07876	720.466
210	19MC023 561	18.6081	5.78467	0.282262	3.62523e-05	0.00105722	0.282248	-18.4818	1.28197	-2.37644	744.619
211	19MC023 570	27.4659	3.83514	0.282217	3.41761e-05	0.00136324	0.282198	-20.0922	1.20855	-4.31407	736.634
319	19MC035 4	13.131	4.71815	0.281466	2.1603e-05	0.000782494	0.281439	-46.6274	0.763937	-6.0808	1840.62
320	19MC035 30	10.3311	4.77688	0.282106	2.04039e-05	0.000651869	0.282093	-24.0072	0.721533	-0.866426	1053.5
321	19MC035 44	7.97195	4.81184	0.281822	3.13093e-05	0.00050887	0.281804	-34.0429	1.10718	8.36537	1905.23
322	19MC035 61	15.883	5.0235	0.282194	2.43965e-05	0.000996879	0.282169	-20.8909	0.862724	8.21163	1334.19
323	19MC035 67	22.6319	4.05314	0.282312	2.45111e-05	0.00137072	0.282286	-16.7219	0.866776	4.73419	998.56
324	19MC035 134	9.99235	4.95413	0.281476	3.66393e-05	0.000602059	0.281455	-46.2978	1.29566	-5.60995	1836.89
325	19MC035 277	18.7269	5.83058	0.281755	2.21058e-05	0.00120409	0.281718	-36.4096	0.781719	-0.869042	1636.67
326	19MC035 296	5.44509	5.32036	0.281423	2.8552e-05	0.00033731	0.281411	-48.1551	1.00967	-4.78935	1940.12
327	19MC035 331	16.1841	4.14256	0.28131	2.71887e-05	0.00100223	0.281265	-52.1669	0.96146	-0.521589	2347.73
328	19MC035 337	10.1283	4.81323	0.281427	2.23175e-05	0.000618171	0.281405	-48.0325	0.789203	-7.60948	1826.38
329	19MC035 342	8.85012	5.50708	0.281463	2.89997e-05	0.00054992	0.281444	-46.7622	1.0255	-6.53081	1813.97
330	19MC035 353	5.79728	4.52058	0.281499	1.98242e-05	0.000362654	0.281485	-45.4707	0.701035	0.918026	2073.16
331	19MC035 355	15.9109	4.77726	0.281265	2.97924e-05	0.000938337	0.281219	-53.7488	1.05354	2.44948	2544.21
332	19MC035 385	7.41718	4.75056	0.281863	2.07067e-05	0.000527132	0.281844	-32.6024	0.732242	9.21784	1880.13
333	19MC035 402	7.56269	5.10186	0.281268	1.74906e-05	0.000486907	0.281244	-53.6298	0.618514	4.79094	2606.57
334	19MC035 508	18.2133	4.09905	0.282279	3.39942e-05	0.00112667	0.282255	-17.897	1.20212	6.7505	1136.75
335	19MC035 525	15.2745	5.12002	0.281265	3.75033e-05	0.000990445	0.281213	-53.7605	1.32621	6.30982	2718.31
336	19MC035 527	5.4078	6.67356	0.28082	1.9889e-05	0.000324087	0.280804	-69.477	0.703327	-9.2279	2676.99
337	19MC035 594	11.5283	6.01026	0.281875	2.18493e-05	0.000725728	0.281851	-32.1715	0.772648	6.92601	1770.58
338	19MC035 595	5.68819	5.89159	0.281127	1.75942e-05	0.000315713	0.281116	-58.6424	0.622175	-17.2389	1854.94
42	COLPRON 00JN17-6 SPOT 67	8.0765	4.65535	0.28156	1.61859e-05	0.000488571	0.281543	-43.3191	0.572374	-2.30868	1844.3
43	COLPRON 00JN17-6 SPOT 156	8.85496	4.13365	0.281614	1.42985e-05	0.000594211	0.281593	-41.4253	0.505632	-0.490804	1846.4
44	COLPRON 00JN17-6 SPOT 107	32.6745	3.95758	0.281697	2.00394e-05	0.00193536	0.281629	-38.4771	0.708645	0.879794	1850.1
45	COLPRON 00JN17-6 SPOT 28	6.48355	4.78497	0.281459	2.31797e-05	0.000419062	0.281445	-46.8781	0.819694	-5.58214	1853.7
46	COLPRON 00JN17-6 SPOT 147	11.4843	5.16908	0.281644	1.40474e-05	0.000697503	0.281619	-40.3447	0.496752	0.714044	1857.4
49	COLPRON 00JN17-6 SPOT 184	4.30617	4.56205	0.281404	1.47436e-05	0.000251843	0.281395	-48.8363	0.521372	-5.80589	1920.7
50	COLPRON 00JN17-6 SPOT 35	8.93347	4.4787	0.2815	1.25029e-05	0.000584931	0.281479	-45.4366	0.442133	-2.68946	1926.6
51	COLPRON 00JN17-6 SPOT 100	2.28571	4.54886	0.281367	1.33807e-05	0.000137924	0.281362	-50.1267	0.473176	-6.75196	1929.5
52	COLPRON 00JN17-6 SPOT 202	13.2826	4.24964	0.281577	1.55481e-05	0.000824342	0.281546	-42.7138	0.549822	0.800038	1973.9
53	COLPRON 00JN17-6 SPOT 296	10.5718	5.93403	0.281305	1.54215e-05	0.000616468	0.281282	-52.3445	0.545345	-8.53998	1976.4
54	COLPRON 00JN17-6 SPOT 180	14.5735	4.79413	0.2815	1.86976e-05	0.000889753	0.281466	-45.4543	0.661196	-1.89143	1980.5
55	COLPRON 00JN17-6 SPOT 52	8.38393	4.509	0.281454	1.54006e-05	0.000514717	0.281435	-47.0697	0.544605	-2.90533	1985.2
56	COLPRON 00JN17-6 SPOT 128	13.841	4.13102	0.281383	1.88133e-05	0.000819839	0.281352	-49.5811	0.665286	-5.60506	1995.5
58	COLPRON 00JN17-6 SPOT 314	10.3796	4.58501	0.281418	2.10963e-05	0.000630685	0.281394	-48.3341	0.746019	-3.92945	2002.9
59	COLPRON 00JN17-6 SPOT 109	13.2436	4.93425	0.281588	2.18543e-05	0.000737538	0.28156	-42.3166	0.772823	2.04322	2006.1
61	COLPRON 00JN17-6 SPOT 142	8.29739	4.82264	0.281513	1.75256e-05	0.000525424	0.281493	-44.9722	0.619751	0.237134	2031.3
62	COLPRON 00JN17-6 SPOT 257	4.13932	4.81295	0.281442	1.47997e-05	0.000264356	0.281431	-47.5014	0.523357	-0.182593	2108
63	COLPRON 00JN17-6 SPOT 227	15.8759	3.98736	0.281444	1.80951e-05	0.000998663	0.281401	-47.4186	0.639888	2.68461	2278
65	COLPRON 00JN17-6 SPOT 185	11.5248	3.93429	0.281352	1.67431e-05	0.000879897	0.281314	-50.6641	0.59208	0.183591	2303.5
66	COLPRON 00JN17-6 SPOT 75	9.71897	2.49288	0.281322	2.39472e-05	0.000707113	0.281291	-51.7407	0.846835	-0.387212	2314.1
67	COLPRON 00JN17-6 SPOT 272	18.1559	4.30535	0.281148	1.59378e-05	0.00116073	0.281093	-57.8916	0.563601	-3.14705	2497.8
68	COLPRON 00JN17-6 SPOT 56	20.2596	4.12348	0.281286	1.70241e-05	0.00131913	0.281222	-53.0016	0.602017	2.76956	2554.2
69	COLPRON 00JN17-6 SPOT 255	20.4155	3.72146	0.281241	1.79454e-05	0.0012373	0.281179	-54.6078	0.634595	2.25922	2596.9
70	COLPRON 00JN17-6 SPOT 163	10.2809	4.62157	0.281191	1.72268e-05	0.000650342	0.281158	-56.3803	0.609185	2.85838	2655.4
KLINKIT
1	COLPRON 00JN1-1 SPOT 169	24.9515	3.25562	0.282502	4.01464e-05	0.00210296	0.282489	-10.0086	1.41968	-3.37221	318.3
2	COLPRON 00JN1-1 SPOT 207	25.9425	4.47529	0.282918	1.41261e-05	0.0018704	0.282907	4.69457	0.499535	11.3946	318.5
3	COLPRON 00JN1-1 SPOT 139	32.4953	4.64589	0.282894	1.79262e-05	0.00227463	0.28288	3.83701	0.633917	10.4928	320.5
4	COLPRON 00JN1-1 SPOT 267	49.7791	3.4539	0.282793	2.34417e-05	0.00347517	0.282771	0.271006	0.828959	6.76948	325.5
5	COLPRON 00JN1-1 SPOT 124	32.7936	4.8905	0.282897	2.37223e-05	0.00273521	0.282881	3.97504	0.838882	10.6502	326.2
6	COLPRON 00JN1-1 SPOT 276	51.9675	4.42255	0.282826	1.53949e-05	0.00342274	0.282805	1.46354	0.544402	8.06655	330.1
7	COLPRON 00JN1-1 SPOT 62	17.8288	3.87406	0.282827	1.66696e-05	0.00134033	0.282819	1.48256	0.58948	8.57336	331.6
8	COLPRON 00JN1-1 SPOT 102	19.2078	4.03689	0.282881	1.96721e-05	0.00153134	0.282871	3.38875	0.695654	10.4454	331.9
9	COLPRON 00JN1-1 SPOT 158	23.3177	4.10954	0.28264	2.01547e-05	0.0014524	0.282631	-5.11762	0.71272	2.02705	335.5
10	COLPRON 00JN1-1 SPOT 140	15.6272	4.42961	0.282565	1.38451e-05	0.00104303	0.282558	-7.79422	0.489599	-0.502079	338.2
11	COLPRON 00JN1-1 SPOT 68	24.5532	4.29672	0.282635	1.63489e-05	0.00156701	0.282625	-5.30164	0.578138	1.93031	340.8
12	COLPRON 00JN1-1 SPOT 88	17.2044	4.24017	0.282383	1.44852e-05	0.00113329	0.282376	-14.2091	0.512234	-6.44576	361.2
13	COLPRON 00JN1-1 SPOT 65	33.6459	4.01632	0.282611	1.97968e-05	0.0019569	0.282598	-6.13781	0.700065	1.53166	365.8
14	COLPRON 00JN1-1 SPOT 77	13.4803	4.08076	0.282234	1.29962e-05	0.000859514	0.282226	-19.4791	0.45958	-8.69559	497
16	COLPRON 00JN1-1 SPOT 246	22.3911	4.2121	0.281869	1.61748e-05	0.00148731	0.281822	-32.3859	0.571983	3.51043	1666.3
17	COLPRON 00JN1-1 SPOT 58	17.4834	5.34377	0.281627	1.63469e-05	0.00111669	0.281589	-40.9587	0.578067	-1.96935	1788.2
18	COLPRON 00JN1-1 SPOT 237	28.5242	4.89762	0.281697	2.33889e-05	0.0020195	0.281628	-38.4789	0.827091	-0.184631	1805.9
19	COLPRON 00JN1-1 SPOT 28	18.4091	4.81505	0.28168	1.65894e-05	0.00123856	0.281637	-39.0873	0.586642	0.41058	1817.4
20	COLPRON 00JN1-1 SPOT 166	14.0592	5.48965	0.282288	1.4681e-05	0.000821112	0.282277	-17.5608	0.519158	-1.34299	744.3
21	COLPRON 00JN1-1 SPOT 104	48.8457	6.085	0.282164	2.12148e-05	0.00329928	0.282104	-21.9523	0.750211	-2.35126	971.2
22	COLPRON 00JN1-1 SPOT 252	6.26578	4.58147	0.282293	1.59243e-05	0.000391931	0.282285	-17.4087	0.563125	4.29356	980.4
23	COLPRON 00JN1-1 SPOT 179	10.9653	4.27168	0.282284	1.57277e-05	0.000686291	0.282271	-17.7213	0.556173	3.93841	987.2
24	COLPRON 00JN1-1 SPOT 212	17.559	4.89536	0.281664	1.5133e-05	0.00109829	0.281626	-39.6353	0.535141	0.275216	1828.3
25	COLPRON 00JN1-1 SPOT 22	15.606	4.5948	0.281423	1.63846e-05	0.000986839	0.281389	-48.1643	0.579401	-7.99303	1835.4
26	COLPRON 00JN1-1 SPOT 134	8.77693	3.43959	0.281561	1.80617e-05	0.000568713	0.281541	-43.2959	0.638709	-2.45757	1841.1
27	COLPRON 00JN1-1 SPOT 301	16.6138	5.25344	0.281668	1.64238e-05	0.00105645	0.28163	-39.5143	0.580787	0.899384	1848.5
28	COLPRON 00JN1-1 SPOT 133	13.7456	4.35101	0.281838	1.55393e-05	0.000902384	0.281807	-33.4733	0.549508	7.38014	1858.4
29	COLPRON 00JN1-1 SPOT 206	11.2313	4.17875	0.281836	1.557e-05	0.000799888	0.281807	-33.5637	0.550596	7.74464	1872.9
30	COLPRON 00JN1-1 SPOT 46	8.10728	4.86376	0.28154	1.63167e-05	0.000496641	0.281521	-44.0278	0.577002	0.286152	1990.1
31	COLPRON 00JN1-1 SPOT 132	10.219	5.3518	0.281343	1.47661e-05	0.00058953	0.281321	-50.9963	0.522168	-6.70934	1995.8
32	COLPRON 00JN1-1 SPOT 116	7.44682	4.8037	0.281486	1.72703e-05	0.000511863	0.281467	-45.9285	0.610722	-1.50239	1996.3
33	COLPRON 00JN1-1 SPOT 147	16.8576	4.25868	0.281383	1.70964e-05	0.00110398	0.281331	-49.5922	0.604574	3.69816	2427.1
34	COLPRON 00JN1-1 SPOT 15	18.7169	4.2314	0.281204	1.68539e-05	0.00111499	0.281151	-55.9041	0.595998	-1.5901	2474.8
35	COLPRON 00JN1-1 SPOT 60	5.58248	5.11589	0.281265	1.42056e-05	0.000352657	0.281248	-53.7383	0.502348	3.35087	2538.8
36	COLPRON 00JN1-1 SPOT 167	4.56645	5.54883	0.281138	1.39075e-05	0.000292474	0.281123	-58.2587	0.491806	-0.509586	2563.9
37	COLPRON 00JN1-1 SPOT 259	11.9756	4.50268	0.281006	1.56682e-05	0.000743372	0.280968	-62.9187	0.554066	-3.17712	2686.4
38	COLPRON 00JN1-1 SPOT 174	12.9079	3.8588	0.281133	1.94446e-05	0.000767832	0.281093	-58.4358	0.68761	1.51111	2696.1
39	COLPRON 00JN1-1 SPOT 1	25.6057	3.45616	0.281139	1.92937e-05	0.00165457	0.281053	-58.1995	0.682274	0.419214	2709.5
40	COLPRON 00JN1-1 SPOT 37	6.90302	4.00008	0.281183	1.50328e-05	0.00046794	0.281159	-56.6435	0.531596	3.96259	2700.3
41	COLPRON 00JN1-1 SPOT 277	5.73221	4.3387	0.28115	1.52562e-05	0.000363206	0.281131	-57.8335	0.539499	2.43772	2677.9
23	COLPRON 99MC079 SPOT 119	13.0249	3.31216	0.282741	1.59813e-05	0.000886673	0.282736	-1.54347	0.56514	5.29886	315.7
24	COLPRON 99MC079 SPOT 246	44.2937	3.79842	0.282339	2.41637e-05	0.0026245	0.282323	-15.7841	0.854491	-9.28037	317.4
25	COLPRON 99MC079 SPOT 205	17.4417	3.06749	0.282455	1.87214e-05	0.00123344	0.282448	-11.6556	0.662037	-4.70799	324.3
26	COLPRON 99MC079 SPOT 88	34.3129	2.39436	0.282635	2.69793e-05	0.00260542	0.282619	-5.29494	0.954056	1.43863	328
27	COLPRON 99MC079 SPOT 120	25.1363	2.96798	0.282474	2.11841e-05	0.00146781	0.282465	-10.9977	0.749123	-3.96978	330.4
28	COLPRON 99MC079 SPOT 302	19.9615	3.39494	0.282534	1.77305e-05	0.00134259	0.282525	-8.89242	0.626997	-1.72616	335.5
29	COLPRON 99MC079 SPOT 89	24.1742	3.16675	0.282406	2.0752e-05	0.00152702	0.282396	-13.3996	0.733843	-6.24153	337.2
30	COLPRON 99MC079 SPOT 177	11.3947	3.28948	0.28254	1.80735e-05	0.000838623	0.282535	-8.66225	0.639124	-1.33148	337.9
31	COLPRON 99MC079 SPOT 196	21.7784	3.48244	0.282519	1.77431e-05	0.00140871	0.28251	-9.40408	0.62744	-2.17801	339
32	COLPRON 99MC079 SPOT 60	17.4332	2.88926	0.282639	2.48974e-05	0.00110462	0.282632	-5.1593	0.880434	2.15992	340
33	COLPRON 99MC079 SPOT 173	23.4428	3.4247	0.282556	2.11707e-05	0.00150473	0.282546	-8.09847	0.748649	-0.848178	341.1
34	COLPRON 99MC079 SPOT 52	20.8805	2.99861	0.28227	2.26422e-05	0.00140444	0.282261	-18.1952	0.800687	-10.9171	341.7
35	COLPRON 99MC079 SPOT 27	16.8852	3.2475	0.282369	2.1714e-05	0.0013532	0.28236	-14.7274	0.767863	-7.40285	343.2
36	COLPRON 99MC079 SPOT 244	12.2603	3.22542	0.282546	1.93252e-05	0.000823412	0.282541	-8.45607	0.683389	-0.960474	345.3
37	COLPRON 99MC079 SPOT 118	17.2928	3.23732	0.282506	1.75657e-05	0.00111507	0.282499	-9.8654	0.621169	-2.4182	346.2
38	COLPRON 99MC079 SPOT 65	17.6901	3.37607	0.282215	2.18623e-05	0.00124576	0.282207	-20.1685	0.773108	-12.7378	347.2
39	COLPRON 99MC079 SPOT 195	29.5389	2.79682	0.282463	2.7036e-05	0.00225597	0.282448	-11.3843	0.956064	-4.15838	348.2
40	COLPRON 99MC079 SPOT 79	18.7791	3.39462	0.282508	1.89725e-05	0.00121624	0.2825	-9.80453	0.670915	-2.31591	349.2
41	COLPRON 99MC079 SPOT 237	23.8052	2.85094	0.282475	2.16761e-05	0.00153553	0.282465	-10.9545	0.766521	-3.49169	351.5
42	COLPRON 99MC079 SPOT 14	15.7899	3.21693	0.282194	1.72676e-05	0.00106993	0.282187	-20.9058	0.610625	-13.2904	353.9
43	COLPRON 99MC079 SPOT 242	22.1086	3.36067	0.282583	2.18368e-05	0.00148106	0.282573	-7.15937	0.772205	0.391768	354.9
44	COLPRON 99MC079 SPOT 281	10.9668	3.7834	0.282199	1.56792e-05	0.000714125	0.282194	-20.7317	0.554456	-12.9475	357.8
45	COLPRON 99MC079 SPOT 55	12.9425	3.49395	0.282296	2.07517e-05	0.000849612	0.28229	-17.3016	0.733833	-9.5359	358.3
46	COLPRON 99MC079 SPOT 124	8.41526	3.31671	0.282234	1.85181e-05	0.000554578	0.28223	-19.4918	0.654847	-11.6116	360.4
47	COLPRON 99MC079 SPOT 192	12.994	3.37502	0.282243	2.16814e-05	0.000859842	0.282237	-19.1638	0.766709	-11.2868	363.6
48	COLPRON 99MC079 SPOT 161	15.4167	3.5008	0.282342	2.8145e-05	0.00138874	0.282332	-15.6794	0.995281	-7.79642	369.7
49	COLPRON 99MC079 SPOT 238	21.9615	3.48961	0.282134	1.9847e-05	0.00158968	0.282123	-23.0101	0.70184	-14.9293	381.6
50	COLPRON 99MC079 SPOT 269	26.6566	3.45137	0.281644	2.13841e-05	0.00160821	0.281632	-40.3577	0.756197	-31.8974	400.4
51	COLPRON 99MC079 SPOT 216	24.4666	4.12976	0.282629	2.25408e-05	0.0013173	0.282618	-5.50323	0.797099	4.53074	468.5
52	COLPRON 99MC079 SPOT 143	15.2416	2.7592	0.282617	2.04167e-05	0.000919375	0.282609	-5.93568	0.721987	4.33495	473.7
53	COLPRON 99MC079 SPOT 160	13.8548	3.59495	0.281951	1.8704e-05	0.000879823	0.281924	-29.479	0.661423	6.55022	1641.3
54	COLPRON 99MC079 SPOT 314	4.69164	3.68586	0.281569	1.90087e-05	0.000277669	0.28156	-42.988	0.672197	-3.63696	1760.1
55	COLPRON 99MC079 SPOT 67	1.99225	3.34102	0.281765	1.48719e-05	0.000143953	0.28176	-36.0841	0.525909	5.28649	1840
56	COLPRON 99MC079 SPOT 87	9.51002	3.7039	0.28144	1.99892e-05	0.000600312	0.281418	-47.5585	0.706869	-5.2237	1909.7
57	COLPRON 99MC079 SPOT 261	14.3598	2.32061	0.280673	1.94398e-05	0.00102796	0.280628	-74.6698	0.68744	-23.8281	2319.1
58	COLPRON 99MC079 SPOT 204	30.6467	2.97287	0.281237	1.79767e-05	0.00210294	0.281129	-54.7543	0.635703	2.1865	2669.9
242	19MC029 32	11.3599	4.15857	0.282422	1.96589e-05	0.000823026	0.282416	-12.8432	0.69519	-5.27823	348.648
243	19MC029 49	12.5306	4.2668	0.282395	3.02047e-05	0.000940149	0.282389	-13.7774	1.06812	-6.18519	351.187
244	19MC029 167	13.1559	3.96166	0.282387	3.45271e-05	0.000944638	0.282381	-14.0898	1.22097	-6.97719	329.14
245	19MC029 180	7.72434	4.38576	0.282472	3.83185e-05	0.000611614	0.282468	-11.0851	1.35504	-3.5674	344.2
246	19MC029 254	8.64833	5.12171	0.282451	2.10192e-05	0.000620788	0.282447	-11.8129	0.743293	-4.22759	347.407
247	19MC029 275	14.9965	4.11393	0.2824	3.08902e-05	0.00114385	0.282393	-13.6144	1.09236	-6.37248	337.144
248	19MC029 284	13.573	4.73142	0.282316	2.15897e-05	0.000977963	0.28231	-16.5682	0.763468	-9.3961	332.309
249	19MC029 290	13.1616	4.68954	0.282457	2.7584e-05	0.00101995	0.282451	-11.5995	0.97544	-4.72936	318.616
250	19MC029 296	14.3489	4.15546	0.282398	2.11418e-05	0.00105578	0.282391	-13.6767	0.747629	-6.20966	346.641
251	19MC029 309	8.51558	5.68838	0.282517	3.65137e-05	0.000858386	0.282511	-9.48544	1.29122	-2.13794	338.915
252	19MC029 329	9.08994	5.49748	0.282545	2.4686e-05	0.000738002	0.282541	-8.47928	0.872961	-1.1934	334.82
253	19MC029 363	5.55811	4.45618	0.282565	2.59485e-05	0.000421389	0.282563	-7.76309	0.917605	-0.0646396	350.306
254	19MC029 408	15.9389	6.32411	0.28256	3.16553e-05	0.0013231	0.282551	-7.95344	1.11941	-0.0211326	370.975
255	19MC029 410	12.4507	6.75212	0.282523	1.93265e-05	0.00108578	0.282516	-9.28263	0.683435	-1.94159	340.976
256	19MC029 442	9.04855	5.66396	0.282439	3.3296e-05	0.000703704	0.282434	-12.2363	1.17743	-4.39497	360.001
257	19MC029 527	11.8491	4.38934	0.282515	2.98697e-05	0.000826253	0.28251	-9.53758	1.05627	-1.80733	356.15
258	19MC029 549	13.9851	3.93658	0.282454	3.69982e-05	0.001017	0.282447	-11.7179	1.30835	-4.25962	345.755
259	19MC029 591	27.0465	4.65724	0.282563	4.9267e-05	0.00152673	0.282553	-7.86354	1.74221	-0.580895	342.868
260	19MC029 596	11.4368	4.35381	0.28252	2.75979e-05	0.00087178	0.282514	-9.3828	0.975933	-1.84046	348.004
261	19MC029 599	10.8257	5.14732	0.282517	3.23725e-05	0.000937298	0.282511	-9.46317	1.14477	-1.8187	353.407
133	COLPRON 04MC133 SPOT 238	5.47739	4.26845	0.282084	1.72807e-05	0.000525338	0.28208	-24.7998	0.611091	-17.0619	353.8
134	COLPRON 04MC133 SPOT 270	31.1401	4.47867	0.282115	1.76745e-05	0.00182461	0.282102	-23.7052	0.625014	-16.2184	356.3
135	COLPRON 04MC133 SPOT 135	20.2767	4.52681	0.282083	1.97951e-05	0.00119513	0.282075	-24.8274	0.700007	-17.139	358.8
136	COLPRON 04MC133 SPOT 84	23.9052	5.61938	0.282051	1.65738e-05	0.00141462	0.282041	-25.9574	0.586093	-18.2965	360
139	COLPRON 04MC133 SPOT 139	13.6356	4.84978	0.281993	1.66585e-05	0.00101414	0.281986	-27.9962	0.589088	-20.1744	363.1
140	COLPRON 04MC133 SPOT 42	6.43619	5.10398	0.281809	1.87035e-05	0.000384798	0.281806	-34.5273	0.661405	-26.5438	363.8
141	COLPRON 04MC133 SPOT 28	19.0931	4.20409	0.282097	1.64142e-05	0.00121695	0.282089	-24.3309	0.58045	-16.5248	364.5
142	COLPRON 04MC133 SPOT 256	8.55252	4.69168	0.28178	1.74614e-05	0.00050911	0.281776	-35.5516	0.61748	-27.577	364.8
143	COLPRON 04MC133 SPOT 69	12.9071	5.11018	0.282041	1.80697e-05	0.00137366	0.282031	-26.327	0.63899	-18.5304	365.9
145	COLPRON 04MC133 SPOT 275	14.4193	4.09871	0.28213	2.9276e-05	0.00102828	0.282123	-23.1523	1.03527	-15.2109	368.6
146	COLPRON 04MC133 SPOT 151	7.71664	5.56396	0.282047	1.62378e-05	0.000662862	0.282043	-26.0815	0.574211	-18.0247	369.9
149	COLPRON 04MC133 SPOT 252	21.993	4.67714	0.281995	2.04748e-05	0.00134019	0.281986	-27.9268	0.72404	-19.7785	382
150	COLPRON 04MC133 SPOT 22	12.4565	4.87957	0.281875	2.10578e-05	0.000734682	0.28187	-32.1709	0.744657	-23.5804	395.4
151	COLPRON 04MC133 SPOT 218	16.6068	4.36264	0.281947	2.20284e-05	0.00139215	0.281936	-29.6456	0.778979	-20.9536	408.1
152	COLPRON 04MC133 SPOT 264	24.2641	4.37199	0.281903	2.01223e-05	0.00147644	0.281891	-31.1913	0.711576	-22.2482	421
96	19MC008 11	16.9578	6.94891	0.282208	3.28462e-05	0.000958043	0.282196	-20.3895	1.16153	-5.47451	688.067
97	19MC008 21	8.47258	8.2106	0.282425	2.58655e-05	0.000662174	0.28242	-12.714	0.914671	-2.9464	447.44
98	19MC008 24	23.715	6.72637	0.282348	3.43553e-05	0.00164372	0.282339	-15.458	1.21489	-9.13347	299.241
99	19MC008 40	13.2944	6.14332	0.28132	5.18379e-05	0.000898678	0.28128	-51.8147	1.83312	-0.521382	2324.83
100	19MC008 41	6.03352	6.34686	0.281286	2.45482e-05	0.000359264	0.281273	-52.9928	0.868086	-9.8655	1931.87
101	19MC008 52	7.10909	5.98083	0.282747	2.36702e-05	0.000607399	0.282742	-1.33508	0.837039	7.93014	423.347
102	19MC008 62	27.2607	4.25553	0.282462	2.09715e-05	0.00176276	0.282451	-11.4063	0.741607	-4.18443	342.662
103	19MC008 86	12.607	5.12919	0.281219	2.89606e-05	0.000767758	0.281182	-55.3743	1.02412	0.063772	2498.42
104	19MC008 88	24.4213	5.11468	0.282365	2.43809e-05	0.00167348	0.282353	-14.8673	0.862169	-7.34223	356.12
105	19MC008 99	18.5573	4.90989	0.282375	1.94371e-05	0.00114639	0.282359	-14.5071	0.687346	1.65563	748.988
106	19MC008 112	23.8847	5.19763	0.282242	3.63839e-05	0.00158291	0.282233	-19.2042	1.28663	-12.9357	296.155
107	19MC008 133	18.6703	5.27901	0.282278	2.57202e-05	0.00133301	0.282269	-17.9444	0.909533	-10.4092	352.951
108	19MC008 142	27.2118	5.00461	0.282329	3.71284e-05	0.00178137	0.282318	-16.108	1.31295	-9.02388	336.517
109	19MC008 158	18.672	5.7185	0.282154	1.91089e-05	0.00126041	0.282131	-22.3099	0.675741	-1.60467	961.289
110	19MC008 187	60.0622	4.16728	0.282235	4.8171e-05	0.00371354	0.282209	-19.4639	1.70345	-12.2541	364.727
111	19MC008 203	16.0414	4.60918	0.282305	1.97448e-05	0.00123897	0.282297	-16.9758	0.698227	-9.53943	347.294
112	19MC008 233	5.83824	4.66967	0.281128	1.66979e-05	0.00034366	0.28111	-58.5918	0.590481	2.21851	2699.81
113	19MC008 241	15.15	4.86909	0.282333	2.36275e-05	0.0010058	0.282326	-15.9971	0.835528	-8.4852	348.264
114	19MC008 268	5.38844	5.31398	0.282294	2.87287e-05	0.000318163	0.28229	-17.3533	1.01592	-1.33157	724.333
115	19MC008 280	57.1035	4.68452	0.282092	3.87744e-05	0.00314825	0.28206	-24.49	1.37116	-13.4853	545.485
116	19MC008 292	29.1992	3.52952	0.282768	3.41875e-05	0.00232618	0.282753	-0.598908	1.20896	6.42611	338.966
117	19MC008 310	20.0563	6.21002	0.282322	3.0206e-05	0.00148625	0.282311	-16.3851	1.06816	-7.8985	399.14
118	19MC008 346	15.7422	3.93987	0.282631	4.51466e-05	0.00123583	0.282623	-5.4427	1.5965	1.73543	334.849
119	19MC008 355	24.2482	6.15379	0.282325	1.84136e-05	0.00151648	0.282315	-16.2565	0.651151	-8.88385	347.28
120	19MC008 359	17.2806	5.02509	0.282033	4.56672e-05	0.00108362	0.282026	-26.5835	1.61491	-19.1548	345.626
121	19MC008 425	28.7883	5.48923	0.282334	3.17616e-05	0.00160539	0.282311	-15.9617	1.12317	-0.325191	735.262
122	19MC008 441	21.9208	5.66785	0.282355	2.42101e-05	0.00134428	0.282347	-15.1903	0.85613	-8.21699	326.753
123	19MC008 452	29.569	7.07552	0.282161	3.07229e-05	0.00181203	0.282146	-22.0552	1.08644	-12.5275	452.705
124	19MC008 475	26.2786	5.52288	0.282337	3.33553e-05	0.00170569	0.282326	-15.8368	1.17953	-8.55377	345.095
125	19MC008 520	15.2519	6.12581	0.281584	3.46092e-05	0.00132682	0.281538	-42.4537	1.22387	-2.44569	1846.08
126	19MC008 528	39.3648	5.55684	0.282347	2.1226e-05	0.00235808	0.282331	-15.4756	0.750607	-8.00735	361.204
127	19MC008 534	9.64156	5.27764	0.282219	2.46239e-05	0.000609803	0.282211	-20.0182	0.870764	-4.56612	705.127
128	19MC008 537	32.0964	4.76672	0.28232	2.90348e-05	0.00227003	0.282305	-16.4581	1.02675	-9.20377	349.951
129	19MC008 562	18.6872	5.51135	0.281206	3.13506e-05	0.00109246	0.281152	-55.8479	1.10864	0.980006	2584.34
130	19MC008 572	16.7983	4.39876	0.282319	4.34105e-05	0.00114555	0.282312	-16.4903	1.5351	-9.61611	320.199
131	19MC008 584	11.5566	5.64918	0.28145	3.49394e-05	0.000695083	0.281424	-47.1916	1.23555	-2.88195	2002.39
47	18MC022 SPOT 34	11.0761	5.49874	0.282517	2.63469e-05	0.000762791	0.282508	-9.47074	0.931693	4.73797	651.1
48	18MC022 SPOT 303	8.09664	6.37678	0.282244	1.78033e-05	0.000558282	0.282237	-19.1432	0.629571	-4.81804	653
49	18MC022 SPOT 305	16.1429	5.66895	0.282333	2.23303e-05	0.000945369	0.282321	-15.9743	0.789656	-0.725936	702.7
50	18MC022 SPOT 229	8.63268	8.17773	0.282303	1.635e-05	0.000540532	0.282295	-17.0589	0.578179	-1.61854	702.9
51	18MC022 SPOT 247	7.63435	6.92001	0.282304	2.53846e-05	0.000438936	0.282298	-17.0085	0.897663	-1.39831	708.4
52	18MC022 SPOT 88	10.7027	5.84809	0.282396	2.03253e-05	0.000740417	0.282386	-13.7721	0.718753	1.7165	709.1
53	18MC022 SPOT 23	23.939	8.48863	0.282325	1.79822e-05	0.00134865	0.282307	-16.2561	0.635896	-1.00665	711.5
54	18MC022 SPOT 207	23.2294	8.74557	0.282217	2.08245e-05	0.00122153	0.2822	-20.0876	0.736406	-4.54762	722.4
55	18MC022 SPOT 290	13.5112	7.52442	0.282349	1.8407e-05	0.000799054	0.282338	-15.4314	0.650918	0.393954	725.8
56	18MC022 SPOT 134	10.1888	6.93876	0.282356	1.73421e-05	0.000584266	0.282348	-15.1584	0.61326	0.777905	726.1
57	18MC022 SPOT 161	23.7569	6.1177	0.282384	2.16279e-05	0.0012328	0.282367	-14.1817	0.764817	1.46218	727
58	18MC022 SPOT 286	6.64631	6.66207	0.282314	2.43893e-05	0.000412581	0.282309	-16.647	0.862466	-0.518959	731.1
59	18MC022 SPOT 276	25.6882	8.36223	0.282334	1.56575e-05	0.00139927	0.282315	-15.9519	0.553688	-0.244709	733.8
60	18MC022 SPOT 54	11.9369	7.86093	0.282289	1.83642e-05	0.000700415	0.282279	-17.5357	0.649404	-1.20069	746.9
61	18MC022 SPOT 148	10.1306	6.2497	0.281722	1.45534e-05	0.000594308	0.281701	-37.6046	0.514644	2.28825	1799.7
62	18MC022 SPOT 126	5.81618	7.97951	0.281423	1.87986e-05	0.000376667	0.28141	-48.1529	0.664767	-7.86152	1807.5
63	18MC022 SPOT 68	9.37476	6.60491	0.281447	1.84719e-05	0.000586553	0.281427	-47.3083	0.653212	-7.21949	1809.7
65	18MC022 SPOT 238	7.97253	6.59887	0.281832	2.0753e-05	0.000578894	0.281812	-33.6954	0.733879	6.76222	1823.1
66	18MC022 SPOT 40	23.9374	5.05951	0.281793	1.54854e-05	0.00162339	0.281736	-35.0805	0.547603	4.44068	1839.2
67	18MC022 SPOT 210	6.16331	6.3831	0.281427	2.19649e-05	0.000404126	0.281413	-48.0267	0.776734	-7.3656	1825.2
68	18MC022 SPOT 274	16.3135	7.26754	0.281621	1.60357e-05	0.00105302	0.281584	-41.1674	0.567063	-1.20517	1828.4
69	18MC022 SPOT 300	19.5787	7.16387	0.281717	2.05166e-05	0.00121777	0.281674	-37.7802	0.725519	2.04177	1830.6
70	18MC022 SPOT 138	10.8599	6.82403	0.281485	2.18563e-05	0.000664044	0.281461	-45.9866	0.772894	-5.39085	1836.1
71	18MC022 SPOT 53	7.415	7.16628	0.281431	2.26154e-05	0.000479865	0.281414	-47.8944	0.799739	-6.84007	1846.6
72	18MC022 SPOT 16	17.1676	5.31044	0.281656	2.67948e-05	0.0010813	0.281618	-39.916	0.947533	0.877977	1867
73	18MC022 SPOT 220	11.4507	6.79966	0.281516	1.86424e-05	0.000694196	0.281491	-44.8781	0.659243	-3.0031	1894.2
74	18MC022 SPOT 114	6.55002	7.02297	0.281418	1.33765e-05	0.000429707	0.281402	-48.3499	0.473029	-5.98999	1901.3
75	18MC022 SPOT 296	9.76955	7.85783	0.281417	1.5721e-05	0.000632527	0.281394	-48.3775	0.555936	-6.1331	1907.7
76	18MC022 SPOT 203	7.24294	7.0346	0.281418	1.2721e-05	0.000646072	0.281395	-48.3368	0.449847	-6.09612	1908.3
77	18MC022 SPOT 21	2.92883	7.63311	0.28127	2.21873e-05	0.000171857	0.281263	-53.5816	0.784598	-10.3259	1926.9
78	18MC022 SPOT 189	9.87455	6.88366	0.281425	2.09616e-05	0.000620259	0.281402	-48.0772	0.741257	-4.0975	1983.5
79	18MC022 SPOT 236	6.4743	7.33046	0.281463	1.77483e-05	0.000449681	0.281446	-46.7609	0.627624	-2.40068	1989.9
80	18MC022 SPOT 277	4.68306	6.90219	0.281464	1.77918e-05	0.00033474	0.281452	-46.7312	0.629164	-4.73114	1879.9
82	18MC022 SPOT 178	10.2371	6.3288	0.281509	1.33048e-05	0.000597494	0.281487	-45.1173	0.47049	-1.30039	1974.4
83	18MC022 SPOT 251	21.858	5.5408	0.281391	1.66593e-05	0.00153293	0.281333	-49.3079	0.589115	-6.37819	1991.6
85	18MC022 SPOT 110	12.0257	6.22897	0.28141	1.78534e-05	0.000776083	0.28138	-48.6149	0.631344	-3.07235	2062
86	18MC022 SPOT 147	15.6609	5.94861	0.281463	1.67704e-05	0.000981122	0.281425	-46.7419	0.593044	-1.34615	2067.8
87	18MC022 SPOT 191	23.1326	6.364	0.281518	2.16834e-05	0.001377	0.281464	-44.7887	0.766779	0.129246	2070.8
88	18MC022 SPOT 212	19.3836	8.40632	0.281397	1.7012e-05	0.00114939	0.281352	-49.0819	0.601589	-3.71545	2077.5
89	18MC022 SPOT 97	7.49147	5.74851	0.281489	1.68398e-05	0.000429513	0.281472	-45.831	0.595499	0.523441	2075.8
90	18MC022 SPOT 217	13.456	5.81123	0.281592	1.82147e-05	0.000825768	0.281561	-42.1841	0.644119	1.26701	1971.1
91	18MC022 SPOT 116	6.75406	6.93791	0.281264	1.62569e-05	0.000451046	0.281242	-53.7852	0.574887	3.78054	2566.8
92	18MC022 SPOT 4	0.897325	8.1126	0.281008	1.5167e-05	4.83773e-05	0.281005	-62.8523	0.536343	-4.48709	2573.2
93	18MC022 SPOT 119	6.44146	7.11122	0.281039	2.06875e-05	0.000433724	0.281017	-61.7585	0.731562	-4.0338	2574.4
94	18MC022 SPOT 235	6.71789	6.2408	0.281184	1.94807e-05	0.000428868	0.281163	-56.6241	0.688888	1.20874	2577.4
95	18MC022 SPOT 193	9.67494	6.45655	0.281121	1.56551e-05	0.000570184	0.281093	-58.8442	0.553604	-1.06281	2586.5
96	18MC022 SPOT 18	8.02071	6.51181	0.281424	1.42893e-05	0.000510318	0.281406	-48.1274	0.505306	-7.577	1826.1

## Sheet: Metadata
Table DR2b. Table of analytical parameters
		ALC NU Plasma MC-ICPMS (Lu-Hf)
Laboratory and Sample Preparation
Laboratory name		Arizona LaserChron Center
Sample type/mineral		Detrital zircon
Sample preparation		Conventional mineral separation, polished 1 inch epoxy mount
Imaging		Hitachi 3400N SEM with BSE
Laser ablation system
Make, Model, and type		Photon Machines Analyte G2 Excimer laser
Ablation cell and volume		HelEx ablation cell
Laser wavelength		193 nm
Pulse width		~8 ns
Energy density		~7 J/cm2
Repetition rate		8 Hz
Alation duration		30 s
Ablation pit depth/ablation rate		~25 microns & 0.8 microns/sec
Spot diameter nominal/actual		40 microns
Sampling mode/pattern		Spot
Carrier gas		Helium
Cell carrier gas flow		0.11 L/min He in inner cup, 0.29 L/min He in cell
ICP-MS instrument
Make, Model, and type		Nu Plasma multicollector HR ICPMS
Sample introduction		ablation aerosol
RF power		1200 W
Make-up gas flow		0.8 L/min Ar
Detection system		12 Faraday collectors with 3e11 ohm resistors, 4 ion counters
Masses measured		Yb171, Yb172, Yb173, Hf174, Lu175, (Hf + Lu + Yb)176, Hf177, Hf178, Hf179, Hf180
Dwell times (ms)		1000 ms for all masses
Total integration time per output data point (sec)		30 seconds
Sensitivity as useful yield		~4000 cps/ppm
IC dead time		22 ns
Data processing
Gas blank		20 sec on-peak zero subtracted
Calibration strategy		FC-1, 91500, R33, TEM, and Mud Tank zircon used as primary standards
Reference material information		Cecil et al. (2011), Gehrels and Pecha (2014)
Data processing package used/Correction for LIEF		HfCalc (in-house Excel-based software)
Mass discrimination		Normalized to primary standard
Common Pb correction, composition and uncertainty
Uncertainty level and propagation		Uncertainties for individual analyses propagated at 1-sigma.
Quality control/validation		Comparison of multiple primary standards
Other information		Primary and secondary standards mounted together with unknowns.
		Analytical methods described by Cecil et al. (2011) and Gehrels and Pecha (2014)
Citations:
Cecil, R., Gehrels, G., Patchett, J., Ducea, M., 2011, U-Pb-Hf characterization of the central Coast Mountains batholith: Implications for petrogenesis and crustal architecture: Lithosphere, v. 3 (4), p. 247-260.
Fisher, C.M., Hanchar, J.M., Samson, S.D., Dhuime, B., Blichert-Toft, J., Vervoort, J.D., Lam, R.,2011. Synthetic zircon doped with hafnium and rare earth elements: a reference material for in situ hafnium isotope analysis. Chem. Geol. 286, 32–47.
Fisher, C.M., Vervoort, J.D., and Hanchar, J.M., 2014, Guidelines for reporting zircon Hf isotopic data by LA-MC-ICPMS and potential pitfalls in the interpretation of these data: Chemical Geology, v. 363, p. 125–133, https://doi .org/10.1016/ j.chemgeo.2013.10.019.
Gehrels, G.E., Valencia, V., Ruiz, J., 2008, Enhanced precision, accuracy, efficiency, and spatial resolution of U-Pb ages by laser ablation–multicollector–inductively coupled plasma–mass spectrometry: Geochemistry, Geophysics, Geosystems, v. 9, Q03017, doi:10.1029/2007GC001805.
Gehrels, G. and Pecha, M., 2014, Detrital zircon U-Pb geochronology and Hf isotope geochemistry of Paleozoic and Triassic passive margin strata of western North America: Geosphere, v. 10 (1), p. 49-65.
Pullen, A., Ibáñez-Mejia, M., Gehrels, G. E., Giesler, D., & Pecha, M., (2018). Optimization of a laser ablation-single collector-inductively coupled plasma-mass spectrometer (Thermo Element 2) for accurate, precise, and efficient zircon U-Th-Pb geochronology. Geochemistry, Geophysics, Geosystems, 19, 3689–3705. https://doi.org/10.1029/2018GC007889
Schaltegger, U., Schmitt, A.K., Horstwood, M.S.A., 2015, U–Th–Pb zircon geochronology by ID-TIMS, SIMS, and laser ablation ICP-MS: Recipes, interpretations, and opportunities: Chemical Geology, v. 402, p. 89-110.
Sláma, J., Košler, J., Condon, D.J., Crowley, J.L., Gerdes, A., Hanchar, J.M., Horstwood, M.S.A., Morris, G.A., Nasdala, L., Norberg, N., Schaltegger, U., Schoene, B., Tubrett, M.N., Whitehouse, M.J., 2008. Plešovice zircon — a new natural reference material for U–Pb and Hf isotopic microanalysis. Chem. Geol. 249, 1–35.
