# Supplementary material
Source: publisher figshare collection journal article supplement (https://gsapubs.figshare.com/articles/dataset/_/22596808)
Supplement: Supplementary file 4 [file 1]

## LEGEND

### Mesozoic and Cenozoic

- undifferentiated intrusions
- undifferentiated volcanic rocks

### North American Continental Margin

- Triassic**
- dark shale, siltstone and limestone
- Paleozoic**
- undifferentiated

### Post - YTT/SMT Amalgamation

- Triassic**
- grey shale, siltstone and limestone
- Permian–Triassic**
- Simpson Lake group

### Slide Mountain terrane

#### INTRUSIVE ROCKS

- Early Permian**
- ultramafic and mafic intrusions

#### LAYERED ROCKS

- Lower–Middle Permian**
- Gatehouse formation
- Lower Permian**
- Campbell Range formation
- Carboniferous–Permian?**
- Fortin Creek group

### Yukon-Tanana terrane

#### LAYERED ROCKS

- Lower Permian**
- Money Creek formation
- Mid-Pennsylvanian to Lower Permian**
- Finlayson Creek limestone
- Upper Mississippian–mid-Pennsylvanian**
- White Lake and King Arctic fms
- Upper Mississippian**
- Whitefish limestone
- Lower Mississippian**
- Tuchitua River formation
- Wolverine Lake group
- Upper Devonian–Lower Mississippian(?)**
- Cleaver Lake formation
- Waters Creek formation
- Grass Lakes group
- Upper Devonian**
- North River formation

#### INTRUSIVE ROCKS

- Early Mississippian**
- Simpson Range plutonic suite
- Late Devonian–Early Mississippian**
- Grass Lakes plutonic suite
- ultramafic and mafic rocks

## SYMBOLS

- Fault - normal
- Fault - transform
- Fault - thrust
- Geological contact
- Unconformity

### DZ samples

- Klinkit
- Finlayson

### VMS deposits

- ① Kudz Ze Kayah
- ② GP4F
- ③ Wolverine
- ④ Kona
- ⑤ Ice

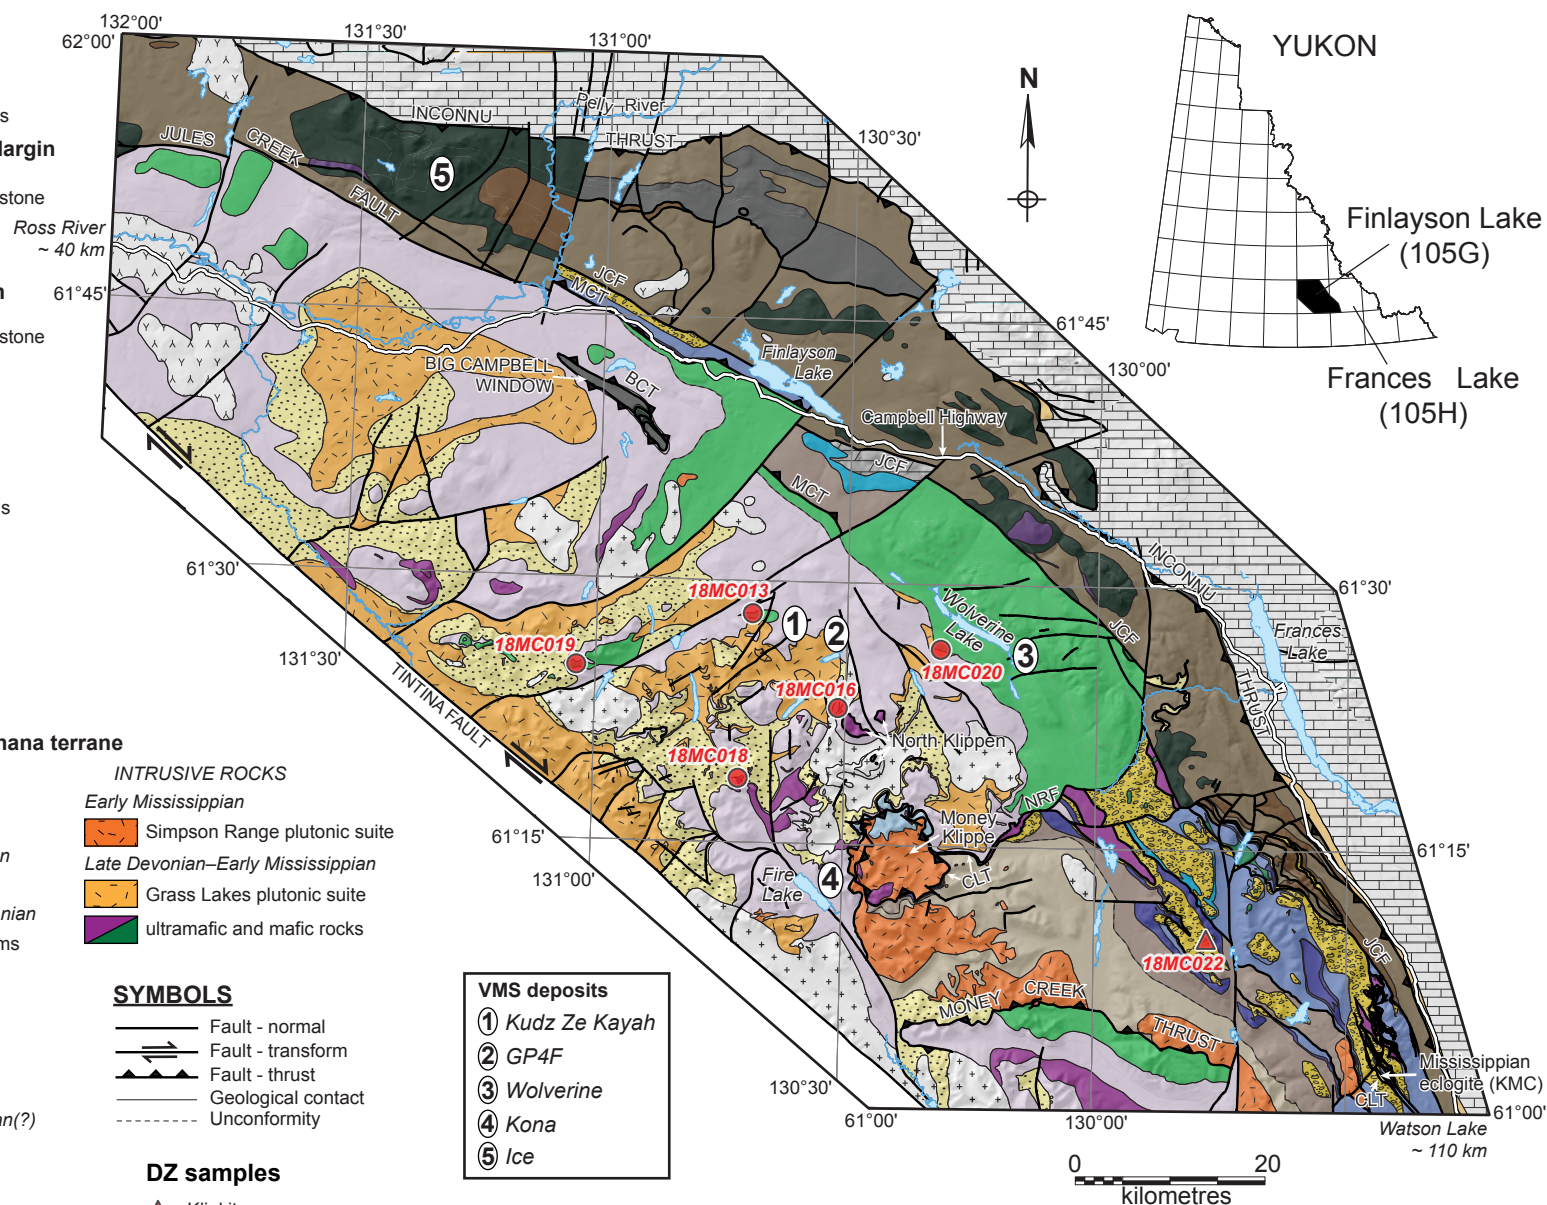

Figure S1. after  
Manor et al.
